# Supplementary material for: Biogenesis of the mitochondrial DNA inheritance machinery in the mitochondrial outer membrane of Trypanosoma brucei
Source: PLoS Pathog. 2017 Dec 29;13(12):e1006808. doi: 10.1371/journal.ppat.1006808 (PMC5764417; doi:10.1371/journal.ppat.1006808)
Supplement: S3 Table — (XLSX) [file ppat.1006808.s005.xlsx]

## Sheet: Results TAC60 IP
	Table S3: Proteins quantified in SILAC-IPs of TAC60
								Data determined across Replicates 1 - 3					Replicate 1							Replicate 2							Replicate 3
	Protein Group ID	Protein IDs	Product Description	Mol. Weight [kDa]	Sequence Coverage [%]	Q-value	# of Proteins in Protein Group	Mean log10 TAC60/Control	p-Value	Sequence Coverage [%]	Peptides	Unique Peptides	Ratio TAC60/Control	log10 Ratio TAC60/Control	Ratio Variability [%]	Ratio Count	Sequence Coverage [%]	Peptides	Unique Peptides	Ratio TAC60/Control	log10 Ratio TAC60/Control	Ratio Variability [%]	Ratio Count	Sequence Coverage [%]	Peptides	Unique Peptides	Ratio TAC60/Control	log10 Ratio TAC60/Control	Ratio Variability [%]	Ratio Count
	543	Tb927.7.1400	hypothetical protein, conserved	60.696	47.6	0	1	1.12652	0.00346213	25.5	7	7	20.174	1.30479	49.836	4	31.8	9	9	9.6481	0.984442	87.054	7	38	11	11	12.3122	1.09034	151.69	8
	447	Tb927.4.1610	hypothetical protein, conserved	39.631	14.8	0	1	0.951168	0.00381615	3.6	1	1	8.0906	0.907981		1	6.1	2	2	12.96	1.11261	101.98	2	14.8	4	4	6.80643	0.832919	39.591	3
	564	Tb927.7.3060	hypothetical protein, conserved	41.862	11.4	0	1	0.787963	0.0472887	11.4	2	2	8.0518	0.905893		1	2.8	1	1				0	8.5	1	1	4.67771	0.670033		1
	468	Tb927.4.4210	ATP-dependent zinc metallopeptidase, putative,metallo-peptidase, Clan MA(E) Family M41	96.221	3.3	0	1	0.640681	0.00371121	1.1	1	1	4.9136	0.6914	12.365	2	1.1	1	1	3.3869	0.529802		1	2.2	1	1	5.02159	0.700841		1
	730	Tb927.9.9660	hypothetical protein, conserved	38.295	10	0	1	0.345136	0.030722	6	2	2	2.3143	0.36442	8.9543	3	6	2	2	1.5169	0.180957	8.0984	3	7.1	2	2	3.09052	0.490032	16.307	2
	491	Tb927.5.2940	stress-induced protein sti1, putative	62.327	11.1	0	1	0.267018	0.0449022	4	2	2	2.1575	0.333951	45.435	2	7.6	5	5	1.2488	0.0964929	10.978	4	11.1	7	7	2.34753	0.370611	14.373	7
	600	Tb927.7.990	chaperone protein DNAj, putative	86.6	9.1	0	1	0.184616	0.0468181	5.9	4	4	1.2495	0.0967363	21.655	3	4	3	3	1.431	0.15564	1.6521	3	8.2	5	5	2.00204	0.301473	15.845	4
	39	Tb11.02.5105b;Tb11.02.5105	hypothetical protein, conserved	14.971	14.6	0	2	0.104812	0.0237239	0	0	0				0	6.2	1	1	1.2961	0.112639		1	8.5	1	1	1.25022	0.096986		1
	726	Tb927.9.9060	Lsm12 protein, putative	21.06	9.5	0	1	0.102798	0.00421094	0	0	0				0	9.5	2	2	1.2631	0.101438	16.08	2	4.2	1	1	1.27104	0.104158		1
	494	Tb927.5.3400	calcium-translocating P-type ATPase,calcium pump	110.32	2	0	1	0.0622337	0.020226	0.9	1	1	1.2171	0.0853263		1	0.9	1	1	1.15	0.0606978		1	1.1	1	1	1.09819	0.0406771		1
	244	Tb927.11.1020	ribokinase, putative	35.288	3	0	1	0.0496164	0.0137639	0	0	0				0	3	1	1	1.1155	0.0474696		1	3	1	1	1.12658	0.0517631		1
	280	Tb927.11.15020;Tb927.11.15910	iron superoxide dismutase (TbSODB)	23.28	13.5	0	2	-0.03028	0.0377341	5.3	2	2	0.92494	-0.0338864		1	13.5	4	4	0.94043	-0.0266735	5.1261	4	0	0	0				0
	572	Tb927.7.4060;Tb927.7.4070	calpain-like cysteine peptidase, putative,cysteine peptidase, Clan CA, family C2, putative	12.873	19.1	0	2	-0.0455463	0.0158294	19.1	2	2	0.90515	-0.0432794	24.563	3	19.1	2	2	0.89575	-0.0478132	18.32	3	0	0	0				0
	262	Tb927.11.13180	hypothetical protein conserved	61.21	2.1	0.0031299	1	-0.0499055	0.000481641	2.1	1	1	0.8916	-0.0498299		1	2.1	1	1	0.89129	-0.049981		1	0	0	0				0
	723	Tb927.9.8880;Tb927.9.8850	actin A	41.895	2.7	0	2	-0.065453	0.0371051	2.7	1	1	0.87541	-0.0577885		1	2.7	1	1	0.84505	-0.0731176		1	0	0	0				0
	65	Tb927.10.660;Tb11.v5.0500	2-oxoisovalerate dehydrogenase alpha subunit, putative	46.369	3.4	0	2	-0.0697197	0.04929	3.4	1	1	0.8733	-0.0588365		1	3.4	1	1	0.83061	-0.0806028		1	0	0	0				0
	716	Tb927.9.7730	hypothetical protein, unlikely	8.0486	10.6	0.0059259	1	-0.0725592	0.012344	10.6	1	1	0.85164	-0.0697439		1	10.6	1	1	0.84067	-0.0753745		1	0	0	0				0
	121	Tb927.10.12000	iron-sulfur cluster assembly protein, putative	11.772	13.1	0	1	-0.0753412	0.00230244	13.1	1	1	0.83968	-0.0758862		1	13.1	1	1	0.84179	-0.0747962		1	0	0	0				0
	667	Tb927.9.11880	hypothetical protein, conserved	51.045	4.5	0	1	-0.085532	0.0306929	2	1	1	0.80574	-0.0938051	3.8354	2	2.5	1	1	0.83703	-0.077259		1	0	0	0				0
	481	Tb927.5.1660	protein phosphatase 2C, putative	46.85	8.7	0	1	-0.0866041	0.0265438	8.7	3	3	0.83298	-0.0793654	6.5409	4	2.8	1	1	0.80567	-0.0938428	8.4586	2	0	0	0				0
	576	Tb927.7.4450	hypothetical protein, conserved	113.23	1.9	0	1	-0.0971891	0.00448309	1.9	2	2	0.80201	-0.0958202	8.8149	2	1.1	1	1	0.79697	-0.098558		1	0	0	0				0
	715	Tb927.9.7670	hypothetical protein, conserved	26.419	10.2	0	1	-0.0992306	0.0106404	10.2	2	2	0.80184	-0.0959123	5.2607	2	10.2	2	2	0.78968	-0.102549	0.45509	2	0	0	0				0
	334	Tb927.11.510;Tb927.11.500	RNA-binding protein, UBP2 (UBP2)	19.559	5.7	0	2	-0.109229	0.0155869	5.7	1	1	0.78727	-0.103876		1	5.7	1	1	0.7681	-0.114582		1	0	0	0				0
	585	Tb927.7.5930;Tb927.7.5990;Tb927.7.5970;Tb927.7.5950;Tb927.7.5960;Tb927.7.5940	Protein Associated with Differentiation (PAD1)	66.232	3.4	0	6	-0.122683	0.00983888	1.8	1	1	0.76052	-0.118889		1	3.4	2	2	0.74735	-0.126476	16.569	3	0	0	0				0
	354	Tb927.11.6740	pumilio/PUF RNA binding protein 10, putative	75.167	1.5	0	1	-0.142022	0.0364405	1.5	1	1	0.69446	-0.158353		1	1.5	1	1	0.7487	-0.125692		1	0	0	0				0
	118	Tb927.10.11600	hypothetical protein, conserved	66.002	2.2	0	1	-0.186795	0.0266585	2.2	1	1	0.62737	-0.202476		1	2.2	1	1	0.67435	-0.171115		1	0	0	0				0
	443	Tb927.3.860	acyl carrier protein,acyl carrier protein, mitochondrial precursor, putative (ACP)	16.531	5.4	0	1	-0.232162	0.0185583	5.4	1	1	0.60449	-0.218611		1	5.4	1	1	0.56792	-0.245713		1	0	0	0				0
	405	Tb927.2.5810	hypothetical protein, conserved	174.02	0.6	0	1	-0.246935	0.0498226	0.6	1	1	0.61949	-0.207966		1	0.6	1	1	0.51772	-0.285905		1	0	0	0				0
	710	Tb927.9.6470	hypothetical protein, conserved	26.69	4.7	0.0015974	1	-0.394308	0.0480682	4.7	1	1	0.35131	-0.454309		1	4.7	1	1	0.46312	-0.334306		1	0	0	0				0
	124	Tb927.10.12330	zinc finger protein family member, putative (ZC3H34)	22.365	11.9	0	1	-0.0880773	0.0506756	11.9	2	2	0.79028	-0.102219	4.9914	2	11.9	2	2	0.84346	-0.0739355	19.762	2	0	0	0				0
	187	Tb927.10.4180	TFIIF-stimulated CTD phosphatase, putative	28.189	4.5	0	1	-0.069508	0.0516207	4.5	1	1	0.83008	-0.08088		1	4.5	1	1	0.87471	-0.0581359		1	0	0	0				0
	387	Tb927.2.1140	retrotransposon hot spot protein (RHS, pseudogene), putative,retrotransposon hot spot protein 3 (RHS3), interrupted	37.92	7.9	0.005848	1	-0.0485072	0.052618	7.9	2	1	0.87781	-0.0565995		1	3.5	1	1	0.91114	-0.0404149		1	4.4	1	0				0
	384	Tb927.11.9720	40S ribosomal protein S27, putative	9.6302	16.3	0	1	0.0914455	0.0539959	0	0	0				0	16.3	1	1	1.2797	0.107108		1	16.3	1	1	1.19065	0.0757828		1
	552	Tb927.7.2170	hypothetical protein, conserved	168.67	1.8	0	1	-0.0927189	0.0564944	1.8	2	2	0.83929	-0.076088	18.732	2	1.1	1	1	0.77741	-0.10935	0.058158	2	0	0	0				0
	666	Tb927.9.11840	Pre-rRNA-processing protein PNO1, putative (PNO1)	24.075	16.1	0	1	-0.0957412	0.0626101	6.9	1	1	0.76768	-0.11482		1	16.1	3	3	0.83818	-0.0766627	8.4423	3	0	0	0				0
	655	Tb927.9.10560	hypothetical protein, conserved	19.035	4.8	0.0016051	1	0.204967	0.0654681	4.8	1	1	1.769	0.247728		1	4.8	1	1	1.4528	0.162206		1	0	0	0				0
	623	Tb927.8.4580	hypothetical protein, conserved	58.084	1.9	0	1	-0.0449477	0.0669687	1.9	1	1	0.88197	-0.0545462		1	1.9	1	1	0.92183	-0.0353492		1	0	0	0				0
	438	Tb927.3.5340	Hsc70-interacting protein (Hip), putative	42.028	8.6	0	1	0.088384	0.0727841	0	0	0				0	5.5	2	2	1.169	0.0678145	32.04	2	3.1	1	1	1.28515	0.108953		1
	208	Tb927.10.6050;Tb11.v5.0198;Tb11.v5.0197	clathrin heavy chain (CHC)	190.62	1.2	0	3	0.43315	0.0736581	0.5	1	1	3.6432	0.561483		1	0.5	1	1	4.7252	0.67442		1	0.7	1	1	1.15757	0.0635466		1
	427	Tb927.3.3490	high mobility group protein, putative (TDP1)	30.866	8.5	0	1	-0.221358	0.076849	8.1	2	2	0.681	-0.166853	12.933	2	7	2	2	0.52983	-0.275863	69.96	2	0	0	0				0
	264	Tb927.11.13280	mitochondrial RNA binding protein 2 (GBP25)	25.106	8.5	0	1	-0.0361402	0.0786078	8.5	2	2	0.93966	-0.0270293	11.012	3	8.5	2	2	0.90105	-0.0452511	4.5415	3	0	0	0				0
	42	Tb11.0560;Tb927.10.1170	chrX additional, unordered contigs,hypothetical protein, conserved	131.7	1.7	0	2	-0.107666	0.0795767	0.9	1	1	0.83143	-0.0801743		1	1.7	2	2	0.73256	-0.135157	30.777	2	0	0	0				0
	592	Tb927.7.7030	hypothetical protein, conserved	68.705	3.5	0	1	0.114899	0.0829024	1.2	1	1	1.1391	0.0565619		1	1.2	1	1	1.164	0.065953		1	2.3	1	1	1.66795	0.222182		1
	330	Tb927.11.4130	ubiquitin-like protein, putative	67.282	11.3	0	1	-0.0754145	0.0843061	11.3	4	4	0.80192	-0.095869	4.0749	4	11.3	4	4	0.88113	-0.05496	6.8278	4	0	0	0				0
	60	Tb927.10.510;Tb11.v5.0374	hypothetical protein, conserved	37.06	11.4	0	2	0.160311	0.0857215	6.3	2	2	1.1352	0.0550724	7.8251	2	11.4	4	4	1.3077	0.116508	0.96677	4	6.9	2	2	2.03869	0.309352	6.1217	2
	674	Tb927.9.12890	hypothetical protein, conserved	16.341	11.4	0	1	-0.0302954	0.0897192	11.4	1	1	0.91397	-0.0390681		1	11.4	1	1	0.95165	-0.0215227		1	0	0	0				0
	79	Tb927.8.2470;Tb11.v5.0799	hypothetical protein, conserved	11.223	11.7	0	2	0.0311532	0.0909929	11.7	1	1	1.0816	0.0340667		1	11.7	1	1	1.0069	0.00298634		1	11.7	1	1	1.13869	0.0564066		1
	46	Tb927.10.15270;Tb11.v5.0998;Tb11.1240	metallo- peptidase, Clan MG, Family M24	43.784	2.3	0.0016287	3	-0.0906968	0.0954556	2.3	1	1	0.76078	-0.118741		1	2.3	1	1	0.86566	-0.0626526		1	0	0	0				0
	245	Tb927.11.1050	RNA processing factor 1, putative,ribosome biogenesis protein	39.646	3	0	1	-0.2037	0.0958965	3	1	1	0.54076	-0.266995		1	3	1	1	0.72376	-0.140405		1	0	0	0				0
	725	Tb927.9.9000	isopentenyl-diphosphate delta-isomerase (type II) (idi1)	38.986	3.1	0	1	-0.0857377	0.0969953	3.1	1	1	0.77143	-0.112703		1	3.1	1	1	0.87343	-0.0587719		1	0	0	0				0
	727	Tb927.9.9290	Polyadenylate-binding protein 1 (Poly(A)-binding protein 1) (PABP 1) (PABP1)	63.029	7.1	0	1	0.0494645	0.0990977	1.6	1	1	1.0373	0.0159044		1	5.1	3	3	1.0757	0.0316912	10.721	3	3.5	2	2	1.26124	0.100798	1.9919	3
	237	Tb927.10.9430	phosphoribosylpyrophosphate synthetase, putative (PRS)	40.477	2.4	0	1	-0.118381	0.0992333	2.4	1	1	0.69738	-0.156531		1	2.4	1	1	0.83132	-0.0802318		1	0	0	0				0
	493	Tb927.5.3120	eukaryotic translation initiation factor 2 beta subunit, putative (EIF2B)	34.967	2.9	0	1	-0.0949602	0.103631	2.9	2	2	0.74642	-0.127017	6.758	2	2.6	1	1	0.86516	-0.0629036		1	0	0	0				0
	325	Tb927.11.3570	aminopeptidase, putative,metallo-peptidase, Clan MA(E) Family M1	98.098	3.8	0	1	-0.0329764	0.108209	0	0	0				0	2.8	2	2	0.90232	-0.0446394	0.73848	3	2.4	2	2	0.952109	-0.0213134	26.2	2
	84	Tb927.11.11330;Tb11.v5.1035;Tb11.v5.1034;Tb927.11.11290	heat shock protein 70	71.408	50.8	0	4	0.098942	0.109546	21.9	13	11	1.1333	0.0543449	29.51	16	37.4	18	18	1.0773	0.0323367	12.937	22	29.2	14	13	1.62235	0.210144	8.1555	18
	574	Tb927.7.4290	hypothetical protein, conserved	33.703	4.4	0	1	0.0833605	0.110654	0	0	0				0	3.7	1	1	1.1302	0.0531553	19.476	2	4.4	1	1	1.29887	0.113566	11.195	2
	226	Tb927.10.8020	prolyl oligopeptidase, putative,serine peptidase clan SC, family S9A, putative (POP)	77.624	2.1	0	1	-0.106622	0.117048	2.1	1	1	0.71171	-0.147697		1	2.1	1	1	0.85991	-0.065547		1	0	0	0				0
	389	Tb927.2.2520;Tb927.2.2510	voltage-dependent anion-selective channel	29.189	7.4	0	2	0.136395	0.118335	3.7	1	1	1.5473	0.189575		1	7.4	2	2	1.2112	0.0832159	2.9323	2	0	0	0				0
	235	Tb927.10.920	hypothetical protein, conserved	32.531	2.7	0.0044709	1	-0.0683614	0.118507	2.7	1	1	0.80342	-0.0950574		1	2.7	1	1	0.90852	-0.0416655		1	0	0	0				0
	355	Tb927.11.6790	predicted WD40 repeat protein	89.011	2.7	0	1	0.0540136	0.118609	0	0	0				0	1.5	1	1	1.0787	0.0329007		1	2.7	2	2	1.18885	0.0751266	11.813	2
	255	Tb927.11.11570	Translation initiation factor eIF-2B subunit epsilon, putative,eIF-2B GDP-GTP exchange factor subunit epsilon (EIF2BE)	87.632	2.6	0	1	0.05823	0.119174	1.1	1	1	1.0848	0.0353497		1	0	0	0				0	1.5	1	1	1.20534	0.0811103		1
	649	Tb927.9.10000	hypothetical protein, conserved	13.513	9.9	0	1	-0.142546	0.120483	9.9	1	1	0.63207	-0.199235		1	9.9	1	1	0.82062	-0.0858579		1	0	0	0				0
	393	Tb927.2.3610	hypothetical protein, conserved	16.06	12.5	0	1	0.0603511	0.121991	0	0	0				0	12.5	1	1	1.2153	0.0846835		1	12.5	1	1	1.08647	0.0360187	0.88103	2
	53	Tb927.10.5930;Tb927.10.5950;Tb927.10.5940;Tb11.v5.0190	protein kinase, putative	54.749	10.8	0	4	-0.0326927	0.123541	2	1	1	0.85481	-0.0681304		1	8.4	2	2	0.9294	-0.0317973	10.277	2	2.4	1	1	1.00427	0.00184968		1
	328	Tb927.11.3970	hypothetical protein, conserved	78.028	1.1	0	1	-0.0661289	0.125748	1.1	1	1	0.80593	-0.0937027		1	1.1	1	1	0.91505	-0.0385552		1	0	0	0				0
	303	Tb927.11.1890	hypothetical protein, conserved	36.025	3.7	0	1	0.0301544	0.133838	0	0	0				0	3.7	1	1	1.1057	0.0436373		1	3.7	1	1	1.03913	0.0166715		1
	246	Tb927.11.10510	ubiquinone biosynthesis methyltransferase, putative	32.094	13.2	0	1	0.0428512	0.133942	10.4	3	3	1.174	0.0696681	4.6533	3	7.3	2	2	1.1814	0.072397	8.028	3	10.1	3	3	0.969368	-0.0135113	3.9656	3
	265	Tb927.11.13360	AAA ATPase, putative	141.17	2.5	0	1	-0.0729219	0.135693	0.8	1	1	0.78336	-0.106039		1	0.8	1	1	0.91242	-0.0398052		1	1.7	1	1				0
	505	Tb927.6.990;Tb927.6.1060;Tb927.6.1050;Tb927.6.1040;Tb927.6.1030;Tb927.6.1000;Tb927.6.980;Tb927.6.970;Tb927.6.960;Tb927.6.1020;Tb927.6.1010	cysteine peptidase, Clan CA, family C1, Cathepsin L-like (CP)	48.324	1.8	0.0016077	11	0.0534226	0.136798	0	0	0				0	1.8	1	1	1.0689	0.0289371		1	1.8	1	1	1.19649	0.077908		1
	114	Tb927.10.10880	ATP-binding cassette sub-family F member 1, putative,ATPase, putative (ABCF1)	77.697	3.1	0	1	-0.0460893	0.137828	3.1	2	2	0.85626	-0.0673943	3.0205	2	1.5	1	1	0.94453	-0.0247842	9.4582	2	0	0	0				0
	677	Tb927.9.13490	aminopeptidase P, putative,metallo-peptidase, Clan MG, Family M24	54.408	1.8	0.0016155	1	1.12509	0.138325	1.8	1	1	4.0075	0.602874		1	0	0	0				0	1.8	1	1	44.3912	1.6473		1
	288	Tb927.11.16030	proteasome regulatory non-ATP-ase subunit 7 (RPN7)	45.549	2.5	0	1	-0.0637228	0.138387	2.5	1	1	0.80665	-0.0933149		1	2.5	1	1	0.92442	-0.0341307		1	0	0	0				0
	471	Tb927.4.4910	3,2-trans-enoyl-CoA isomerase, mitochondrial precursor, putative	45.333	2.8	0.0031397	1	-0.10217	0.138702	2.8	1	1	0.70837	-0.14974		1	2.8	1	1	0.88186	-0.0546004	3.2042	2	0	0	0				0
	365	Tb927.11.760	protein phosphatase 2C, putative	45.599	12.5	0	1	-0.0816761	0.141561	3.4	1	1	0.75753	-0.1206		1	12.5	6	6	0.90625	-0.042752	4.3693	6	0	0	0				0
	388	Tb927.2.2440	proteasome regulatory non-ATPase subunit 6 (RPN6)	57.323	3.9	0	1	0.0399139	0.142362	3.3	1	1	1.0051	0.00220927		1	3.3	1	1	1.0566	0.0239106		1	3.9	1	1	1.24057	0.0936219		1
	451	Tb927.4.2000	ruvB-like DNA helicase, putative,ATP-dependent DNA helicase, putative	52.61	4.6	0	1	-0.12911	0.143311	2.5	1	1	0.57077	-0.243539		1	2.5	1	1	0.64341	-0.191512		1	2.1	1	1	1.11615	0.0477211		1
	342	Tb927.11.6140	40S ribosomal protein S15A, putative	14.645	6.9	0.0031797	1	-0.0699991	0.146068	6.9	1	1	0.78599	-0.104583		1	6.9	1	1	0.92169	-0.0354151		1	0	0	0				0
	110	Tb927.10.10400	hypothetical protein, conserved	37.867	8.6	0	1	0.37149	0.146407	2.1	1	1	3.4848	0.542178		1	2.1	1	1	5.204	0.716337		1	6.4	2	2	0.717721	-0.144045	74.288	2
	136	Tb927.10.1420	metallo-peptidase, Clan MG, Family M24,methionine aminopeptidase 2, putative (MetAP2)	51.382	1.9	0	1	-0.0928071	0.14823	1.9	1	1	0.72536	-0.139446		1	1.9	1	1	0.89915	-0.0461679		1	0	0	0				0
	278	Tb927.11.14950	zinc finger protein 2 (ZFP2)	15.767	7.2	0	1	-0.101085	0.154277	7.2	1	1	0.70095	-0.154313		1	7.2	1	1	0.89566	-0.0478568		1	0	0	0				0
	501	Tb927.5.800;Tb927.5.790	casein kinase I, isoform 2 (CK1.2)	38.374	9.3	0	2	-0.300575	0.155365	6	3	3	0.79408	-0.100136	9.1811	3	5.4	2	2	0.88111	-0.0549699	9.8075	2	6.6	2	2	0.179218	-0.746619	281.46	2
	318	Tb927.11.2750	hypothetical protein, conserved	52.991	27.9	0	1	-0.0622718	0.156372	27.9	2	2	0.80244	-0.0955874	11.927	3	27.9	3	3	0.9355	-0.0289562	7.9918	4	0	0	0				0
	485	Tb927.5.2150	hypothetical protein, conserved	60.078	3.4	0	1	-0.0836859	0.157779	3.4	1	1	0.74313	-0.128935		1	3.4	1	1	0.9153	-0.0384365		1	0	0	0				0
	675	Tb927.9.13380	phosphoinositide-binding protein, putative	48.172	2.4	0	1	-0.0337711	0.164184	2.4	1	1	0.88528	-0.0529193		1	2.4	1	1	0.96689	-0.0146229		1	0	0	0				0
	105	Tb927.1.90	retrotransposon hot spot protein (RHS, pseudogene), putative	67.289	4.1	0	1	-0.0476474	0.166076	4.1	2	1	0.84132	-0.0750388	1.3388	2	4.1	2	1	0.95443	-0.0202559	3.5018	2	2	1	0				0
	458	Tb927.4.2930	hypothetical protein, conserved	29.306	3.7	0	1	-0.0896544	0.166342	3.7	1	1	0.72228	-0.141294		1	3.7	1	1	0.91619	-0.0380145		1	0	0	0				0
	553	Tb927.7.2190	hypothetical protein, conserved	29.242	4.5	0	1	-0.0782736	0.170221	4.5	1	1	0.75052	-0.124638		1	4.5	1	1	0.92916	-0.0319095		1	0	0	0				0
	311	Tb927.11.2260	eukaryotic translation initiation factor 4e, putative (eIF4E)	26.024	12.4	0	1	0.0502033	0.171682	0	0	0				0	12.4	2	2	1.0475	0.020154	12.245	2	6.9	1	1	1.20296	0.0802527		1
	358	Tb927.11.6980	hypothetical protein, conserved	68.158	4.4	0	1	-0.118781	0.172287	3.1	2	2	0.64538	-0.190184		1	4.4	3	3	0.89665	-0.047377	19.179	2	0	0	0				0
	567	Tb927.7.3370	hypothetical protein, conserved	67.485	2	0	1	-0.0610048	0.172656	2	1	1	0.69969	-0.155094		1	2	1	1	0.90723	-0.0422826		1	2	1	1	1.03362	0.0143625		1
	618	Tb927.8.4150	hypothetical protein, conserved	33.246	8	0	1	0.151866	0.1732	7	1	1	1.1481	0.0599797		1	0	0	0				0	8	1	1	1.75288	0.243752		1
	220	Tb927.10.7500	fibrillarin (NOP1)	31.643	14.7	0	1	-0.0785362	0.176561	4.7	2	2	0.72617	-0.138962	10.274	3	11.3	3	3	0.70971	-0.148919	9.8542	3	3.3	1	1	1.1279	0.0522723		1
	285	Tb927.11.15820	superoxide dismutase, putative	36.047	5.8	0	1	-0.0715833	0.177894	5.8	2	2	0.76498	-0.11635	8.878	2	5.8	2	2	0.94012	-0.0268167	3.1344	2	0	0	0				0
	199	Tb927.10.5480;Tb927.10.5460	60S ribosomal protein L24, putative	14.595	32	0	2	-0.0508747	0.179512	7.2	1	1	0.82594	-0.0830515		1	32	3	3	0.95786	-0.018698	10.574	3	0	0	0				0
	140	Tb927.10.14710;Tb927.10.14600	40S ribosomal protein S2, putative (RPS2)	28.642	22.2	0	2	0.0389537	0.179548	0	0	0				0	11.7	2	2	1.0335	0.0143105	8.0403	2	22.2	4	4	1.1577	0.0635969	20.308	5
	629	Tb927.8.5640	hypothetical protein, conserved	37.089	9.6	0	1	0.047557	0.180243	0	0	0				0	6	1	1	1.0407	0.0173256		1	3.6	1	1	1.19616	0.0777885		1
	548	Tb927.7.190	thimet oligopeptidase, putative (THOP1)	84.166	2.3	0	1	-0.075708	0.183206	0	0	0				0	1.1	1	1	0.94062	-0.0265858		1	1.2	1	1	0.750188	-0.12483		1
	563	Tb927.7.3050	hypothetical protein, conserved	131.58	2.8	0	1	-0.100101	0.184642	1.7	1	1	0.68282	-0.165694		1	0	0	0				0	1.1	1	1	0.923617	-0.0345081		1
	225	Tb927.10.7990	replication factor C, subunit 5, putative,ATPase, putative	38.734	3.2	0	1	-0.0747263	0.185082	3.2	1	1	0.7519	-0.12384		1	3.2	1	1	0.94273	-0.0256127	0.27286	2	0	0	0				0
	115	Tb927.6.4690;Tb927.10.1100	60S ribosomal protein L9, putative	21.661	13.4	0	2	-0.0596719	0.18573	13.4	2	2	0.79604	-0.0990651	0.51469	2	13.4	2	2	0.95438	-0.0202787	3.4928	2	0	0	0				0
	390	Tb927.2.2970	mitochondrial carrier protein (MCP13)	33.962	7.4	0	1	0.0385536	0.188688	0	0	0				0	3.5	1	1	1.0294	0.0125842		1	3.8	1	1	1.16017	0.064523		1
	583	Tb927.7.580	GTP-binding protein, putative	76.908	3.5	0	1	-0.0774558	0.191444	1.8	1	1	0.74027	-0.13061		1	1.8	1	1	0.94558	-0.0243017		1	0	0	0				0
	222	Tb927.10.770	hypothetical protein, conserved	69.121	5.4	0	1	0.0612689	0.193574	0	0	0				0	2.8	1	1	1.0438	0.0186173		1	5.4	2	2	1.27034	0.10392	7.4999	2
	188	Tb927.10.4240	hypothetical protein, conserved	14.753	8.3	0	1	0.0162761	0.195551	0	0	0				0	8.3	1	1	1.066	0.0277572		1	8.3	1	1	1.0111	0.00479493		1
	102	Tb927.1.450	retrotransposon hot spot protein (RHS, pseudogene), putative	229.01	3	0	1	0.110338	0.197866	1.5	2	0				0	2.6	4	1	1.5466	0.189378		1	2.2	3	1	1.07473	0.0312976		1
	391	Tb927.2.3180;Tb11.v5.0782	kinetoplast polyadenylation/uridylation factor 1,mitochondrial RNA binding protein 1 (KPAF1)	114.38	3.2	0	2	-0.116757	0.203566	0.8	1	1	0.51371	-0.289282		1	2	2	2	0.70048	-0.154604		1	2.4	2	2	1.24056	0.0936165		1
	299	Tb927.11.16740	chaperone protein DNAj, putative	42.846	3.4	0	1	-0.0977022	0.205129	3.4	1	1	0.67434	-0.171121		1	3.4	1	1	0.94562	-0.0242834		1	0	0	0				0
	158	Tb927.10.170	pseudouridine synthase, Cbf5p	48.285	8.4	0	1	0.0267926	0.206454	2.8	1	1	1.0443	0.0188253		1	2.8	1	1	0.96841	-0.0139407		1	8.4	3	3	1.18985	0.0754933	5.8008	3
	407	Tb927.3.1030	RNA-binding protein (RPB28)	39.272	2.5	0	1	-0.0606943	0.206986	2.5	1	1	0.78188	-0.10686		1	2.5	1	1	0.9671	-0.0145286		1	0	0	0				0
	610	Tb927.8.2540	3-ketoacyl-CoA thiolase, putative,ERG10	46.244	5.9	0	1	-0.0404122	0.207532	2.1	1	1	0.75963	-0.119398		1	5.9	3	3	0.98517	-0.00648882	3.7292	3	2.1	1	1	1.01076	0.00465004		1
	656	Tb927.9.10570	predicted zinc finger protein	37.875	6.9	0	1	-0.0745648	0.209496	3.1	1	1	0.73754	-0.132214		1	6.9	2	2	0.9618	-0.0169152	7.6585	2	0	0	0				0
	202	Tb927.10.5760	adenylate kinase, putative	24.31	21.9	0	1	-0.0977483	0.212045	21.9	3	3	0.66899	-0.17458	15.553	3	3.7	1	1	0.95298	-0.0209162		1	0	0	0				0
	227	Tb927.10.8030	hypothetical protein, conserved	28.834	3.5	0.0031496	1	0.0448928	0.217317	0	0	0				0	3.5	1	1	1.0195	0.00838723		1	3.5	1	1	1.20614	0.0813983		1
	669	Tb927.9.12300	replication factor C, subunit 3, putative	39.624	5.3	0	1	-0.0403728	0.219149	5.3	2	2	0.84413	-0.0735907	0.32215	2	3.1	1	1	0.98366	-0.00715499		1	0	0	0				0
	398	Tb927.2.4400	hypothetical protein, conserved	136.9	0.8	0	1	-0.102129	0.220914	0.8	1	1	0.64996	-0.187113		1	0.8	1	1	0.96129	-0.0171456		1	0	0	0				0
	343	Tb927.11.6160	eukaryotic release factor 3, putative (ERF3)	76.914	5.9	0	1	-0.0510009	0.22095	4.4	3	3	0.8064	-0.0934495	14.328	3	3	2	2	0.9805	-0.0085524	26.284	2	1.4	1	1				0
	286	Tb927.11.15850	kinteoplast poly(A) polymerase complex 1 subunit	86.756	5.2	0	1	-0.106642	0.22224	4	3	3	0.6062	-0.217384	14.232	3	3.1	2	2	0.60031	-0.221624	4.5047	2	4	3	3	1.31548	0.119084	9.0748	4
	496	Tb927.5.3800	glutamine hydrolysing (not ammonia-dependent) carbomoyl phosphate synthase, putative	204.09	2.2	0	1	0.0406274	0.224406	0.7	1	1	1.1246	0.0509981		1	1.7	3	3	0.91339	-0.0393437	19.884	3	1.7	3	3	1.28893	0.110228	23.383	3
	482	Tb927.5.1810;Tb927.5.1830	lysosomal/endosomal membrane protein p67 (p67)	72.732	2	0	2	-0.0782652	0.231843	2	1	1	0.65757	-0.182058		1	2	1	1	0.71201	-0.147514		1	2	1	1	1.24387	0.0947764	9.9546	2
	606	Tb927.8.1960	hypothetical protein, conserved	48.425	2.8	0	1	-0.0291845	0.233308	2.8	1	1	0.88012	-0.0554581		1	2.8	1	1	0.99332	-0.00291082		1	0	0	0				0
	168	Tb927.10.270	60S ribosomal protein L32, putative	15.396	28.8	0	1	-0.103157	0.233363	28.8	3	1	0.63671	-0.196058		1	28.8	3	1	0.97666	-0.0102566		1	13.6	1	0				0
	432	Tb927.3.4500;Tb11.v5.0629	fumarate hydratase, class I (FHc)	62.262	8.8	0	2	0.0996782	0.236841	0	0	0				0	5.5	3	3	1.0184	0.00791839	10.107	3	3.4	2	2	1.55395	0.191438	20.354	2
	488	Tb927.5.2770	hypothetical protein, conserved	46.514	3.2	0	1	-0.0345646	0.238062	3.2	1	1	0.85777	-0.0666291		1	3.2	1	1	0.99426	-0.00250003		1	0	0	0				0
	469	Tb927.8.7980;Tb927.4.4380	vacuolar-type proton translocating pyrophosphatase 1 (TVP1)	86.003	4	0	2	0.0531098	0.241068	0	0	0				0	1.3	1	1	1.0067	0.00290007		1	2.7	2	2	1.26858	0.103319	1.5937	2
	429	Tb927.3.3740	hypothetical protein, conserved	69.176	10.6	0	1	-0.0987539	0.24373	3.5	2	2	0.5523	-0.257825	33.616	2	4.5	2	2	0.6795	-0.167811	19.103	2	8.9	4	4	1.34702	0.129374	12.302	4
	111	Tb927.10.1060	T-complex protein 1, delta subunit, putative (TCP-1-delta)	58.361	9	0	1	0.0485102	0.245969	5.4	1	1	0.95156	-0.0215638		1	7.1	2	2	1.0073	0.00315883	8.9183	2	7.3	2	2	1.4586	0.163936	10.717	2
	377	Tb927.11.9220	proteasome regulatory non-ATP-ase subunit 2 (RPN2)	106.51	4.8	0	1	-0.0352459	0.250977	4.8	2	2	0.84975	-0.0707088	4.6613	2	4.8	2	2	1.0005	0.000217093	4.169	3	0	0	0				0
	415	Tb927.3.1840	3-oxo-5-alpha-steroid 4-dehydrogenase, putative,polyprenol reductase	33.355	6	0	1	0.101555	0.251857	0	0	0				0	6	2	2	0.99726	-0.0011916	1.8314	2	3	1	1	1.60067	0.204301		1
	589	Tb927.7.6350	NADH-ubiquinone oxidoreductase, mitochondrial, putative	30.925	2.9	0.0057389	1	-0.0457595	0.252099	2.9	1	1	0.80886	-0.0921266		1	2.9	1	1	1.0014	0.000607587		1	0	0	0				0
	197	Tb927.10.5030;Tb927.7.3680	ubiquitin/ribosomal protein S27a, putative	16.705	13.9	0	2	0.0531512	0.252236	0	0	0				0	5.3	1	1	0.99827	-0.00075198		1	13.9	2	2	1.27954	0.107054	2.8949	2
	651	Tb927.9.10250	small nuclear ribonucleoprotein Sm-F (Sm-F)	8.3616	28	0	1	-0.0599638	0.255566	28	1	1	0.68075	-0.167012		1	28	1	1	0.79604	-0.0990651		1	28	1	1	1.21951	0.0861861		1
	104	Tb927.1.720;Tb927.1.710;Tb927.1.700	phosphoglycerate kinase (PGKA)	55.747	9	0	3	0.0517078	0.255685	6.5	3	3	1.0137	0.00590945	23.785	3	9	4	4	0.93049	-0.0312883	12.923	5	2.2	1	1	1.51531	0.180502		1
	374	Tb927.11.8870	mitochondrial DEAD box protein,KREH1 (KREH1)	60.659	3.3	0	1	-0.0585216	0.256799	3.3	2	2	0.75928	-0.119598	10.533	2	1.8	1	1	1.0059	0.00255481	21.058	2	0	0	0				0
	514	Tb927.6.2360;Tb927.6.2300	adenosine kinase, putative	37.958	7	0	2	0.0729059	0.257954	0	0	0				0	7	2	2	0.99143	-0.00373794	5.329	2	7	2	2	1.41107	0.14955	2.1806	2
	362	Tb927.11.7190	hypothetical protein	24.904	8.2	0	1	-0.052262	0.258342	8.2	2	2	0.78102	-0.107338	20.151	2	8.2	2	2	1.0065	0.00281378	12.668	2	0	0	0				0
	439	Tb927.3.5370	hypothetical protein, conserved	34.254	7.3	0	1	-0.0470382	0.260064	7.3	2	2	0.79956	-0.0971489	5.7956	3	4.2	1	1	1.0071	0.0030726		1	0	0	0				0
	252	Tb927.11.11370;Tb927.11.11360	receptor for activated C kinase 1 (RACK1)	34.69	10.4	0	2	-0.0383982	0.262086	6.6	2	2	0.79401	-0.100174		1	6.6	2	2	0.83941	-0.0760259	12.794	2	7.5	2	2	1.15081	0.0610052	22.892	3
	212	Tb927.10.6630	ATP-dependent DEAD/H RNA helicase HEL64, putative (HEL64)	64.082	5.8	0	1	-0.0675214	0.265683	1.6	1	1	0.60468	-0.218474		1	2.8	1	1	0.83761	-0.0769581		1	1.4	1	1	1.23842	0.0928682		1
	231	Tb927.10.8430	40S ribosomal protein S12, putative	16.061	19	0.0046154	1	0.100903	0.269023	0	0	0				0	19	1	1	0.97086	-0.0128434		1	19	1	1	1.63926	0.214649		1
	630	Tb927.8.5760	hypothetical protein, conserved	53.809	9	0	1	-0.0450502	0.271134	2.1	1	1	0.68328	-0.165401		1	4.8	2	2	0.97764	-0.00982104	14.744	2	6.9	3	3	1.09666	0.0400718	14.261	3
	215	Tb927.10.6820	hypothetical protein, conserved	34.82	3.2	0	1	-0.0526288	0.272456	3.2	1	1	0.77044	-0.113261		1	3.2	1	1	1.0186	0.00800367		1	0	0	0				0
	642	Tb927.8.730	nucleolar RNA-binding protein, putative	28.338	4.7	0	1	0.0424798	0.273156	4.7	1	1	0.87519	-0.0578977		1	4.7	1	1	1.0938	0.0389379		1	4.7	1	1	1.40087	0.146399		1
	76	Tb11.v5.0685;Tb927.8.3110	hypothetical protein, conserved	38.639	6.7	0	2	0.0461112	0.273777	3.2	1	1	0.98297	-0.00745974		1	0	0	0				0	3.5	1	1	1.258	0.099682		1
	172	Tb927.10.290	proteasome alpha 2 subunit, putative	25.354	4.8	0	1	0.095039	0.276492	0	0	0				0	4.8	1	1	0.96095	-0.0172992		1	4.8	1	1	1.61205	0.207377		1
	181	Tb927.10.3710;Tb11.v5.0761	proteasome activator protein PA26 (pa26)	25.258	16.9	0	2	0.0315299	0.276588	0	0	0				0	16.9	2	2	0.98682	-0.00576206	4.0015	2	4.8	1	1	1.17171	0.0688219		1
	555	Tb927.7.2340;Tb927.7.2370	40S ribosomal protein S15, putative	17.474	49.3	0	2	0.0172975	0.277429	25	2	2	0.93846	-0.0275842	1.2466	2	42.8	4	4	1.0526	0.0222634	2.0382	4	49.3	5	5	1.14081	0.0572134	11.794	7
	604	Tb927.8.1420	acyl-CoA dehydrogenase, mitochondrial precursor, putative	55.982	4.2	0	1	0.169094	0.279774	0	0	0				0	4.2	1	1	0.92255	-0.0350101		1	4.2	1	1	2.36155	0.373198		1
	506	Tb927.6.1090	proteasome regulatory ATPase subunit 3 (RPT3)	44.859	6.2	0	1	-0.0380242	0.281641	3.5	1	1	0.7177	-0.144057		1	6.2	2	2	0.97104	-0.0127629	12.288	2	3.5	1	1	1.10344	0.0427472		1
	686	Tb927.9.15290	hypothetical protein, conserved	149.76	3.8	0	1	0.643399	0.283164	0	0	0				0	0.9	1	1	0.70751	-0.150267		1	3	1	1	27.3568	1.43707		1
	395	Tb927.2.4130	enoyl-CoA hydratase/Enoyl-CoA isomerase/3-hydroxyacyl-CoA dehydrogenase, putative	88.9	2.4	0	1	0.0349104	0.283597	1.2	1	1	0.98113	-0.00827344		1	2.4	2	2	1.197	0.0780942	4.9891	2	0	0	0				0
	450	Tb927.4.1930;REV__Tb927.11.13360	RNA-binding protein, putative (EIF3D)	31.293	9.2	0	2	-0.0504065	0.284964	2.6	1	1	0.71919	-0.143156		1	2.6	1	1	0.78392	-0.105728		1	6.6	2	2	1.25218	0.0976653	5.7061	2
	708	Tb927.9.6230;Tb927.9.6170;Tb927.9.6290	unspecified product	41.597	15.1	0	3	-0.0365527	0.286532	4.9	2	2	0.74385	-0.128515	3.8038	2	13	4	4	0.90775	-0.0420337	14.043	4	4.6	2	2	1.15051	0.0608903		1
	465	Tb927.4.3590;Tb927.4.3570	translation elongation factor 1-beta, putative	24.334	15	0	2	0.0563914	0.287137	0	0	0				0	3.5	1	1	0.96611	-0.0149734		1	15	2	2	1.34201	0.127756	0.85291	2
	109	Tb927.10.10390	trypanothione reductase	53.156	3.5	0	1	-0.0205635	0.288404	0	0	0				0	3.5	2	2	0.89784	-0.0468011	6.1443	2	3.5	2	2	1.01315	0.00567405	30.389	2
	661	Tb927.9.11270	T-complex protein 1, eta subunit, putative,t- complex protein 1 (eta subunit), putative (TCP-1-eta)	61.471	15.1	0	1	0.0380425	0.288501	1.8	1	1	0.95208	-0.0213266		1	15.1	4	4	0.9598	-0.0178193	4.799	4	4.6	2	2	1.42322	0.153273	3.1674	3
	174	Tb927.10.2970	hypothetical protein, conserved	13.79	16.5	0	1	-0.0413789	0.28885	16.5	2	2	0.80477	-0.0943282	20.586	2	16.5	2	2	1.027	0.0115704	14.572	2	0	0	0				0
	643	Tb927.8.7380;Tb927.4.5050	dihydrolipoamide dehydrogenase, point mutation,acetoin dehydrogenase e3 component, putative	60.014	4	0	2	0.0621314	0.290723	0	0	0				0	2	1	1	0.95864	-0.0183445		1	2	1	1	1.3887	0.142607		1
	421	Tb927.3.2670	hypothetical protein, conserved	28.84	11.2	0	1	0.0471964	0.294437	0	0	0				0	4.1	1	1	0.96509	-0.0154322		1	7.1	1	1	1.28773	0.109825		1
	89	Tb927.1.1390	hypothetical protein, conserved	28.393	2.9	0.0045386	1	-0.967404	0.297621	2.9	1	1	0.0011612	-2.93509		1	2.9	1	1	0.0089581	-2.04778	196.97	2	2.9	1	1	120.411	2.08067		1
	352	Tb927.11.6590;Tb11.v5.0360	aminopeptidase, putative,metallo-peptidase, Clan MF, Family M17	55.359	4.2	0	2	0.101405	0.297866	0	0	0				0	4.2	2	2	0.91999	-0.0362169	10.062	2	2.3	1	1	1.73391	0.239027		1
	453	Tb927.4.2080	C2 domain containing protein (CC2D)	104.88	2.8	0	1	0.0756095	0.301071	0	0	0				0	1.5	1	1	0.93498	-0.0291977		1	2.8	2	2	1.51501	0.180417	1.5593	2
	509	Tb927.6.1860	conserved protein	30.977	4.7	0	1	0.0250782	0.30151	0	0	0				0	4.7	1	1	0.97772	-0.0097855		1	4.7	1	1	1.148	0.059942		1
	575	Tb927.7.4390	threonine synthase, putative	73.873	4.7	0	1	-0.0386045	0.302755	0	0	0				0	1.3	1	1	0.80776	-0.0927177		1	3.4	1	1	1.03636	0.0155087		1
	464	Tb927.5.1610;Tb927.4.3550	60S ribosomal protein L13a, putative	25.711	6.8	0	2	0.152054	0.302959	3.2	1	1	0.86821	-0.0613752		1	0	0	0				0	6.8	2	2	2.31997	0.365482	102.21	2
	367	Tb927.11.7840	ribonucleoside-diphosphate reductase large chain (RNR1)	94.606	1.3	0	1	-0.0968536	0.303662	1.3	1	1	0.5842	-0.233438		1	1.3	1	1	1.0958	0.0397313	13.354	2	0	0	0				0
	198	Tb927.10.5370;Tb927.10.5360	40S ribosomal protein S10, putative	19.285	31.4	0	2	-0.0757579	0.304965	8.7	1	1	0.48685	-0.312605		1	30.8	5	5	0.92441	-0.0341354	3.5271	4	13.4	3	3	1.31664	0.119467	20.207	3
	130	Tb927.10.12890	bifunctional aminoacyl-tRNA synthetase, putative	90.96	3.3	0	1	0.0107604	0.305162	0	0	0				0	1.4	1	1	0.98954	-0.00456665		1	2	1	1	1.06191	0.0260874		1
	487	Tb927.5.2570	translation initiation factor, putative (EIF3B)	79.81	1.4	0	1	-0.0244043	0.305973	1.4	1	1	0.78414	-0.105606		1	1.4	1	1	1.0151	0.00650883		1	1.4	1	1	1.06141	0.0258846		1
	320	Tb927.11.3190	hypothetical protein, conserved	184.71	2.2	0	1	0.0277237	0.30634	2.2	4	4	0.89282	-0.0492361	17.598	5	1.3	2	2	1.0483	0.0204856	7.7765	3	0.7	1	1	1.29396	0.111922	12.347	2
	361	Tb927.11.7170	seryl-tRNA synthetase	53.857	5.2	0	1	0.0485582	0.306453	0	0	0				0	5.2	2	2	0.95234	-0.021208	3.5189	2	3.3	1	1	1.31318	0.118324		1
	332	Tb927.11.4460	ALBA-Domain Protein (ALBA1)	14.038	34.4	0	1	-0.0210855	0.308627	34.4	3	3	0.84018	-0.0756277	8.8611	3	34.4	3	3	0.92366	-0.0344879	23.809	3	28	2	2	1.11393	0.0468591	43.967	2
	346	Tb927.11.6280	pyruvate phosphate dikinase (PPDK)	100.45	9.7	0	1	-0.0247642	0.31053	5.6	5	5	0.7998	-0.0970186	9.7614	4	9.7	8	8	0.93698	-0.0282697	16.385	6	2.5	2	2	1.12459	0.0509957	3.9305	2
	617	Tb927.8.3750	Nucleolar protein 56, putative (NOP56)	54.358	6.4	0	1	-0.0809315	0.311315	6.4	2	2	0.60757	-0.216404	7.3245	2	4.6	1	1	0.59392	-0.226272		1	4.6	1	1	1.58446	0.199881		1
	544	Tb927.7.1600	C-1-tetrahydrofolate synthase, cytoplasmic, putative	31.931	3	0	1	-0.0615109	0.317928	3	1	1	0.62014	-0.20751		1	3	1	1	0.73468	-0.133902		1	3	1	1	1.43509	0.156879		1
	545	Tb927.7.1650	hypothetical protein, conserved	84.058	2.4	0	1	-0.0376021	0.319887	1.2	1	1	0.80019	-0.0968069		1	1.2	1	1	1.051	0.0216027		1	0	0	0				0
	193	Tb927.10.4740	nucleolar RNA-binding protein, putative	7.4056	14.3	0	1	-0.0254	0.321061	14.3	1	1	0.80633	-0.0934872		1	14.3	1	1	0.89715	-0.0471349		1	14.3	1	1	1.1599	0.0644222		1
	690	Tb927.9.1850;Tb927.9.1810	60S ribosomal protein L35, putative	15.144	14.2	0	2	-0.024348	0.322814	14.2	2	2	0.79498	-0.0996438	1.7114	2	14.2	2	2	0.93166	-0.0307426	1.7741	3	8.7	1	1	1.14115	0.0573422		1
	540	Tb927.7.1050;Tb927.7.1040	40S ribosomal protein S16, putative	16.998	20.1	0	2	-0.0368733	0.323029	6.7	1	1	0.71525	-0.145542		1	13.4	2	2	0.8792	-0.0559123	17.944	2	8.1	1	1	1.23264	0.0908346		1
	98	Tb927.1.3180;Tb927.10.560	40S ribosomal protein S11, putative	20.059	12.1	0	2	0.0641764	0.324097	5.2	1	1	0.91225	-0.0398861		1	0	0	0				0	6.9	1	1	1.47312	0.168239		1
	530	Tb927.6.4920;Tb927.6.4910;Tb927.6.4900;Tb927.6.4890;Tb927.6.4880;Tb927.6.4870;Tb927.6.4860;Tb927.6.4850;Tb927.6.4840	S-adenosylmethionine synthetase, putative (METK1)	43.54	13.6	0	9	0.0568599	0.324277	4.3	2	2	0.81221	-0.0903317	8.872	2	7.3	3	3	0.9901	-0.00432094	17.416	3	6.3	1	1	1.84176	0.265232		1
	156	Tb927.9.15210;Tb927.10.1590	ribosomal protein L36, putative	12.457	20.2	0	2	0.0295478	0.324834	20.2	3	3	0.89164	-0.0498105	17.265	3	20.2	3	3	1.0026	0.0011277	10.68	3	6.4	1	1	1.37191	0.137326		1
	527	Tb927.6.4370	eukaryotic translation initiation factor 3 subunit 7-like protein	57.974	12.8	0	1	-0.0392017	0.326901	10.7	4	4	0.70186	-0.15375	13.199	3	10.7	4	4	0.85879	-0.066113	5.1986	3	9.5	4	4	1.26549	0.102257	3.0938	5
	520	Tb927.6.3230	RNA pseudouridylate synthase, putative	51.608	6.7	0	1	-0.0363007	0.328871	1.7	1	1	0.76601	-0.115766	5.4612	2	1.7	1	1	0.79915	-0.0973717		1	5	2	2	1.27126	0.104235	3.791	2
	578	Tb927.7.5180;Tb927.7.5170	60S ribosomal protein L23a, putative	18.17	25.6	0	2	0.0201972	0.328989	7.9	1	1	0.9465	-0.0238794	10.443	3	7.9	1	1	0.96829	-0.0139946		1	25.6	3	3	1.25448	0.0984654	5.6618	4
	100	Tb927.1.4100	cytochrome oxidase subunit IV (COXIV)	40.534	7.6	0	1	-0.0263158	0.32901	7.6	3	3	0.85016	-0.0704993	5.3922	3	7.6	3	3	1.042	0.0178677	4.3984	3	0	0	0				0
	116	Tb927.10.11390	60S ribosomal protein L6, putative	21.185	39.1	0	1	-0.0329882	0.32939	34.4	7	7	0.74235	-0.129391	5.7382	8	26.6	6	6	0.8742	-0.0583892	6.1594	7	29.7	4	4	1.22692	0.0888157	6.3781	6
	729	Tb927.9.9630	hypothetical protein, conserved	38.92	5.4	0	1	0.0726321	0.330523	0	0	0				0	5.4	2	2	0.88993	-0.0506442	9.288	2	3.4	1	1	1.57003	0.195908		1
	637	Tb927.8.6440	RNA-binding protein, putative (RPB20)	20.37	13	0	1	-0.0385337	0.330792	4.9	1	1	0.681	-0.166853		1	4.9	1	1	0.9033	-0.044168		1	13	2	2	1.24572	0.0954197	12.623	2
	404	Tb927.2.5440	hypothetical protein, conserved	96.001	3.5	0	1	-0.0443933	0.3312	3.5	2	2	0.69297	-0.159286	4.0507	2	2.5	1	1	0.79192	-0.101319		1	2.5	1	1	1.34099	0.127424		1
	317	Tb927.11.2690	succinyl-coA:3-ketoacid-coenzyme A transferase, mitochondrial precursor, putative	53.096	10.3	0	1	-0.0454628	0.334079	4.1	2	2	0.63564	-0.196789	21.923	2	3.9	2	2	0.87385	-0.0585631	1.177	2	10.3	5	5	1.31511	0.118964	7.6623	6
	556	Tb927.7.2360	N-acetyltransferase, putative	34.599	12.7	0	1	-0.0376505	0.336068	6.2	1	1	0.74477	-0.127978		1	12.7	2	2	0.79453	-0.0998897	1.1694	2	6.5	1	1	1.30291	0.114916		1
	88	Tb927.1.120;Tb927.2.450;Tb927.4.220;Tb11.v5.0495;Tb927.2.480;Tb11.v5.0800;Tb927.6.5170;Tb11.v5.1020;Tb927.6.5160;Tb927.2.1100;Tb927.1.70	retrotransposon hot spot protein 4 (RHS4), putative	98.024	6.7	0	11	0.0123213	0.337794	5.3	5	0				0	6.7	6	1	0.97785	-0.00972776	2.9865	2	2.7	2	1	1.08236	0.0343703		1
	497	Tb927.5.3810	orotidine-5-phosphate decarboxylase/orotate phosphoribosyltransferase, putative,OMPDCase-OPRTase, putative	49.955	1.7	0	1	0.131381	0.338208	1.7	1	1	2.3292	0.367207		1	1.7	1	1	0.78624	-0.104445		1	0	0	0				0
	228	Tb927.10.8190	T-complex protein 1, theta subunit, putative,CCT-theta, putative (TCP-1-theta)	58.081	16.8	0	1	0.0304073	0.338585	5.4	2	2	0.90158	-0.0449957	1.8201	2	15.3	7	7	0.95633	-0.0193922	14.684	8	6.7	4	4	1.4309	0.15561	4.9242	3
	417	Tb927.3.1970	hypothetical protein, conserved	36.498	9.9	0	1	0.0385133	0.339781	5.6	2	2	0.81248	-0.0901873	23.947	2	7.8	3	3	1.0449	0.0190747	9.0013	3	5	2	2	1.53692	0.186653	37.29	2
	47	Tb11.1420;Tb11.1370;Tb927.11.1850	hypothetical protein,chrXI additional, unordered contigs	50.917	7.5	0	3	0.0155173	0.341753	0	0	0				0	1.6	1	1	0.97033	-0.0130805		1	5.9	2	2	1.10692	0.0441151	7.5993	3
	319	Tb927.11.3030	phosphoribosylpyrophosphate synthetase, putative (PRS)	39.402	11	0	1	-0.0405073	0.341884	11	2	2	0.71726	-0.144323	16.835	2	11	2	2	0.78126	-0.107204	5.5322	2	8.4	1	1	1.34898	0.130006		1
	513	Tb927.6.2230	RGG protein	86.64	8.1	0	1	-0.0341179	0.343035	2.6	2	2	0.69086	-0.16061	21.746	2	3.7	3	3	0.92494	-0.0338864	19.833	3	5.8	4	4	1.23635	0.0921427	4.054	5
	218	Tb927.10.740	structural maintenance of chromosome 4, putative (SMC4)	154.7	0.5	0.0071023	1	-0.0211336	0.343143	0.5	1	1	0.79687	-0.0986125		1	0.5	1	1	0.94879	-0.0228299		1	0.5	1	1	1.14299	0.0580416		1
	81	Tb927.10.1800;Tb11.v5.0832	hypothetical protein, conserved	38.251	15.8	0	2	-0.026172	0.34323	12	4	4	0.76528	-0.11618	17.567	5	9.4	3	3	0.91405	-0.03903	11.948	4	13.2	4	4	1.19315	0.0766938	12.304	5
	219	Tb927.10.7410	succinyl-CoA ligase [GDP-forming] beta-chain, putative	44.905	8.6	0	1	0.0290706	0.343349	0	0	0				0	6.4	3	3	0.94373	-0.0251522	4.5244	3	3.8	2	2	1.21142	0.0832934	3.021	2
	445	Tb927.4.1270	ruvB-like DNA helicase, putative	49.905	2.2	0	1	0.0857079	0.346267	0	0	0				0	2	1	1	0.83611	-0.0777366		1	2.2	1	1	1.77481	0.249152		1
	704	Tb927.9.5690	60S acidic ribosomal protein, putative	11.09	59.3	0	1	0.0387283	0.34753	0	0	0				0	29.2	1	1	0.92078	-0.0358441		1	59.3	3	3	1.29808	0.113301	7.3356	3
	205	Tb927.10.5840	translation elongation factor 1-beta, putative	21.959	17.4	0	1	0.0257844	0.348985	17.4	2	2	1.1954	0.0775133	60.408	2	17.4	2	2	0.81448	-0.0891196	24.317	2	17.4	2	2	1.22733	0.0889596	4.5925	2
	714	Tb927.9.7620;Tb927.9.7590	60S ribosomal protein L11, putative	22.369	19.1	0	2	-0.0174251	0.349471	15.5	3	3	0.85345	-0.0688219	24.116	3	19.1	4	4	0.90656	-0.0426034	4.4948	3	10.8	2	2	1.14591	0.05915	7.8766	2
	475	Tb927.5.1060	mitochondrial processing peptidase, beta subunit, putative,metallo-peptidase, Clan ME, Family M16	54.122	14.7	0	1	-0.0272812	0.351321	6.7	3	3	0.75666	-0.121099	6.3886	3	13.1	4	4	0.89037	-0.0504295	22.976	4	6.1	3	3	1.22938	0.0896852	9.0395	3
	504	Tb927.5.940	NADH-dependent fumarate reductase, putative	87.388	17.4	0	1	0.025609	0.351598	11.5	5	1	0.8239	-0.0841255		1	14.4	7	1	1.1131	0.0465342		1	12.2	6	1	1.30142	0.114418		1
	345	Tb927.11.6250	hypothetical protein, conserved	27.599	6.3	0	1	-0.0330058	0.352834	3.3	1	1	0.79573	-0.0992343		1	6.3	2	2	1.0795	0.0332226	18.434	2	0	0	0				0
	194	Tb927.10.4850	hypothetical protein, conserved	51.34	6.1	0	1	0.017492	0.354218	1.9	1	1	0.93216	-0.0305095		1	4	2	2	0.96565	-0.0151803	8.6364	2	2.1	1	1	1.25362	0.0981659		1
	161	Tb927.10.2020;Tb927.10.2010;Tb11.v5.0732	hexokinase (HK2)	51.148	18.3	0	3	-0.0293115	0.354279	9.3	3	3	0.71747	-0.144196	7.5745	3	12.1	4	4	0.92258	-0.034996	8.4945	4	18.3	6	6	1.23384	0.0912577	11.772	6
	200	Tb927.8.1110;Tb927.10.5610	40S ribosomal protein S9, putative	22.051	18.4	0	2	0.0196987	0.354709	12.6	3	3	0.86631	-0.0623267	11.49	2	13.7	3	3	1.0596	0.0251419	11.086	3	4.2	1	1	1.24819	0.0962807		1
	524	Tb927.6.3870	RNA-binding protein, putative (SGN1)	22.904	20.1	0	1	-0.0266016	0.355738	15.4	3	3	0.75833	-0.120142	3.2507	4	15.4	3	3	0.88831	-0.0514354	1.7639	4	20.1	4	4	1.2353	0.0917724	3.497	5
	178	Tb927.10.3520	protease regulatory ATPase subunit 4 (RPT4)	44.855	3	0	1	0.0674221	0.35591	0	0	0				0	3	1	1	0.84878	-0.0712049		1	3	1	1	1.60712	0.206049		1
	119	Tb927.10.11760	pumilio/PUF RNA binding protein 6 (PUF6)	93.062	1.4	0	1	0.0516672	0.356118	0	0	0				0	1.4	1	1	0.88157	-0.0547432		1	1.4	1	1	1.43906	0.158078		1
	275	Tb927.11.14250	T-complex protein 1, epsilon subunit, putative (TCP-1-epsilon)	59.381	15.4	0	1	0.0292894	0.356658	7.1	2	2	0.88043	-0.0553052	6.4907	2	7.1	2	2	0.94777	-0.023297	5.5077	2	13.9	3	3	1.46714	0.16647	35.246	3
	103	Tb927.1.4680	hypothetical protein, conserved	37.287	4.8	0	1	-0.0302744	0.357479	4.8	1	1	0.7406	-0.130416	4.94	2	4.8	1	1	0.85156	-0.0697847	3.3643	2	4.8	1	1	1.28641	0.109378	12.651	2
	519	Tb927.6.3170	hypothetical protein, conserved	50.815	4.2	0	1	-0.0167326	0.357564	4.2	2	2	0.82388	-0.084136	11.547	3	4.2	1	1	0.95556	-0.019742	0.1243	2	4.2	1	1	1.13157	0.0536804		1
	94	Tb927.1.2400;Tb927.1.2380;Tb927.1.2360;Tb927.1.2340;Tb11.v5.0468	alpha tubulin	49.787	9.1	0	5	-0.0314354	0.357577	1.8	1	1	0.69243	-0.159624		1	9.1	4	4	0.9244	-0.0341401	18.219	4	2.2	1	1	1.25736	0.0994581	10.543	3
	68	Tb927.10.10970;Tb927.10.10960;Tb927.10.10950;Tb927.10.10940;Tb927.10.10930;Tb927.10.10920;Tb927.10.10900;Tb927.10.10890;Tb11.v5.0543;Tb927.10.10980;Tb927.10.10910	heat shock protein, putative	80.793	29.4	0	11	0.0306064	0.357901	11.6	8	8	0.89965	-0.0459264	6.7831	8	27.8	16	16	0.91448	-0.0388258	5.024	17	13.6	11	11	1.50166	0.176571	7.7464	13
	113	Tb927.10.10850	argonaute-like protein (AGO1)	99.184	2.8	0	1	0.0179283	0.358142	1.2	1	1	0.89882	-0.0463273		1	1.2	1	1	1.0022	0.000954398		1	1.6	1	1	1.25649	0.0991579		1
	653	Tb927.9.10400	hypothetical protein, conserved	50.645	30.8	0	1	-0.0481506	0.360103	3.2	2	2	0.64856	-0.18805	4.1136	2	5.1	3	3	0.72398	-0.140273	19.291	5	30.8	4	4	1.52711	0.183871	5.6759	4
	512	Tb927.6.2210	hypothetical protein, conserved	123.85	3.1	0	1	0.0245965	0.361305	2.1	2	2	0.83316	-0.0792716	3.394	3	2.1	2	2	1.056	0.0236639	10.175	3	3.1	4	4	1.34709	0.129397	12.03	4
	558	Tb927.7.2450	hypothetical protein, conserved	54.394	2.5	0	1	0.0262748	0.362539	2.5	1	1	0.93167	-0.0307379		1	2.5	1	1	1.2114	0.0832876		1	0	0	0				0
	628	Tb927.8.5330	tyrosyl/methionyl-tRNA synthetase, putative	24.204	5.4	0.0044643	1	-0.0563036	0.363793	5.4	1	1	0.66107	-0.179753		1	5.4	1	1	1.1672	0.0671453		1	0	0	0				0
	316	Tb927.11.2650	heat shock protein 84, putative	84.2	4.4	0	1	0.0287185	0.363918	0	0	0				0	1.6	1	1	0.92403	-0.0343139		1	4.4	3	3	1.23524	0.091751	2.6071	2
	133	Tb927.10.13720	RNA-binding protein 29, putative (RBP29)	40.678	3.4	0	1	-0.0468981	0.364353	3.4	1	1	0.58266	-0.234585		1	3.4	1	1	0.83953	-0.0759638	2.366	2	3.4	1	1	1.47861	0.169854		1
	73	Tb927.2.830;Tb11.v5.0655;Tb927.4.200;Tb11.v5.0325;Tb11.v5.0442;Tb11.1800;Tb09.v4.0013;Tb927.6.160;Tb927.4.240	retrotransposon hot spot protein (RHS, pseudogene), putative,retrotransposon hot spot protein 1 (RHS1), interrupted	40.504	14.8	0	9	-0.0189869	0.365307	5.7	2	1	0.81696	-0.0877992		1	12.5	4	1	0.90669	-0.0425412		1	3.4	1	1	1.18408	0.0733798		1
	279	Tb927.11.14960	pumilio/PUF RNA binding protein 7, putative (PUF7)	78.663	2.6	0	1	0.0543717	0.365414	0	0	0				0	2.6	1	1	0.85809	-0.0664672		1	2.6	1	1	1.49696	0.175211		1
	587	Tb927.7.6180	hypothetical protein, conserved	29.957	36.7	0	1	-0.0306821	0.365565	19.4	2	2	0.71908	-0.143223	8.4232	2	31.7	3	3	0.85651	-0.0672676	21.754	3	14	2	2	1.31354	0.118444	3.3968	3
	411	Tb927.3.1680	hypothetical protein, conserved	35.191	6.3	0	1	-0.0947106	0.366033	6.3	2	2	0.49397	-0.306299	60.344	2	0	0	0				0	4.1	1	1	1.30881	0.116878	5.8079	2
	560	Tb927.7.280	cyclophilin-type peptidyl-prolyl cis-trans isomerase, putative (PPIase)	24.302	15.1	0	1	0.0122575	0.367676	4	1	1	1.0018	0.000781027		1	8.9	2	2	0.92088	-0.035797	4.0116	2	11.1	2	2	1.17975	0.0717886	14.612	3
	241	Tb927.11.10020	short-chain dehydrogenase, putative	33.958	6.1	0	1	-0.0254678	0.368387	3.2	1	1	0.74719	-0.126569		1	3.2	1	1	0.8945	-0.0484197		1	6.1	2	2	1.25483	0.0985853	0.15809	2
	312	Tb927.11.2300	eukaryotic peptide chain release factor subunit 1, putative (ERF1)	50.976	8	0	1	-0.0267186	0.368543	8	4	4	0.75156	-0.124036	6.265	3	6	3	3	0.86377	-0.0636019	7.301	3	2	1	1	1.2808	0.107482		1
	425	Tb927.3.3320;Tb927.3.3310	60S ribosomal protein L13, putative	25.427	20.6	0	2	-0.021913	0.36954	9.6	3	3	0.79558	-0.0993161	3.0578	5	14.7	3	3	0.87808	-0.0564659	7.7338	5	16.1	5	5	1.23039	0.090043	7.3741	8
	440	Tb927.3.5520	26S proteasome regulatory non-ATPase subunit (RPN1)	99.897	2.3	0	1	0.0230153	0.370437	2.3	1	1	0.84672	-0.0722602		1	2.3	1	1	1.013	0.00560945		1	2.3	1	1	1.36677	0.135697		1
	486	Tb927.5.2160;Tb927.5.2260;Tb927.5.2230;Tb927.5.2170;Tb927.5.2200	conserved protein	12.346	26.7	0	5	-0.0173059	0.370703	26.7	3	3	0.78403	-0.105667	10.435	3	17.2	2	2	1.0152	0.00655161	0.12806	2	8.6	1	1	1.1148	0.0471979		1
	658	Tb927.9.10920	kinetoplastid kinetochore protein 3,protein kinase, putative (kkt3)	118.15	2.5	0	1	-0.0179252	0.371799	2.5	2	2	0.79001	-0.102367	12.969	2	2.5	2	2	0.96727	-0.0144523	1.7169	2	1.1	1	1	1.15623	0.0630441		1
	213	Tb927.10.6640	COP-coated vesicle membrane protein erv25 precursor, putative,ER--golgi transport protein erv25 precursor, putative	28.188	4.3	0	1	0.0183123	0.37182	4.3	1	1	0.92646	-0.0331733		1	4.3	1	1	0.938	-0.0277972		1	4.3	1	1	1.30589	0.115907		1
	565	Tb927.7.3080	hypothetical protein, conserved	47.366	4.9	0	1	-0.022795	0.372015	2.3	1	1	0.77887	-0.108535		1	2.3	1	1	0.8815	-0.0547777		1	2.6	1	1	1.24431	0.0949276		1
	652	Tb927.9.10310	mitochondrial carrier protein,mitochondrial carrier protein (MCP11)	34.295	7.9	0	1	0.0287079	0.372626	0	0	0				0	4.4	1	1	0.91377	-0.0391631		1	3.5	1	1	1.24905	0.096579		1
	125	Tb927.10.12430	hypothetical protein, conserved	73.017	1.5	0.0016103	1	-0.0337817	0.372994	1.5	1	1	0.70899	-0.14936		1	1.5	1	1	0.79864	-0.0976489		1	1.5	1	1	1.3985	0.145664		1
	392	Tb927.2.340	retrotransposon hot spot protein 4 (RHS4), putative	97.84	7.1	0	1	-0.0290311	0.374286	5.7	5	2	0.72001	-0.142661	7.2493	3	5.7	5	2	0.85635	-0.0673487	5.5634	3	5.1	4	1	1.32714	0.122917	0.70771	2
	341	Tb927.11.600	hypothetical protein, conserved	12.081	21.7	0	1	0.0159791	0.374756	0	0	0				0	21.7	1	1	0.94948	-0.0225142		1	21.7	1	1	1.13363	0.0544723		1
	413	Tb927.3.1790	pyruvate dehydrogenase E1 beta subunit, putative	37.566	27.6	0	1	-0.0298063	0.374809	12.4	3	3	0.71265	-0.147124	1.2648	3	22.4	5	5	0.85283	-0.0691375	4.8317	5	27.6	6	6	1.33919	0.126842	13.691	7
	597	Tb927.7.800	mitochondrial RNA binding complex 1 subunit (MRB800)	60.484	1.8	0	1	0.056172	0.374942	1.8	1	1	0.77753	-0.109283		1	1.8	1	1	0.82114	-0.0855828	0.24099	2	1.8	1	1	2.30878	0.363382		1
	408	Tb927.3.1120	GTP-binding nuclear protein rtb2, putative (rtb2)	24.406	9.7	0	1	-0.0272217	0.376595	9.7	4	4	0.69972	-0.155076	15.583	3	9.2	3	3	0.92657	-0.0331218	6.9399	3	9.2	3	3	1.278	0.106532	7.1839	4
	634	Tb927.8.6110	3-hydroxy-3-methylglutaryl-CoA synthase, putative (HMGS)	54.669	13	0	1	0.0206598	0.37751	0	0	0				0	8.6	1	1	0.9325	-0.0303512		1	13	3	3	1.17943	0.0716707	8.6685	2
	707	Tb927.9.5900	glutamate dehydrogenase (GDH)	112.11	12.5	0	1	-0.0148256	0.377612	8.3	8	8	0.82543	-0.0833198	14.243	7	10.6	9	9	0.95224	-0.0212536	10.787	9	6.9	5	5	1.14841	0.0600965	6.4427	3
	510	Tb927.6.1870	eukaryotic translation initiation factor 4e, putative	46.541	2.6	0	1	-0.0527457	0.378354	2.6	1	1	0.54986	-0.259748		1	2.6	1	1	0.73425	-0.134156		1	2.6	1	1	1.72055	0.235667		1
	515	Tb927.6.2420	p22 protein precursor	25.349	15	0	1	0.0218502	0.379561	3.1	1	1	0.93108	-0.031013		1	15	2	2	0.8926	-0.0493431	6.796	2	11.9	1	1	1.39929	0.145907		1
	171	Tb927.3.1370;Tb927.10.2840	40S ribosomal protein S25, putative	12.56	7.1	0.0071429	2	0.0169375	0.380064	7.1	1	1	0.84981	-0.0706782		1	7.1	1	1	1.0588	0.0248139		1	7.1	1	1	1.24933	0.0966766		1
	706	Tb927.9.5840;Tb927.9.5750	unspecified product	22.424	14.6	0	2	-0.0200465	0.381185	7	1	1	0.7404	-0.130534		1	14.1	3	3	1.0114	0.00492295	6.5802	3	14.6	4	4	1.16271	0.0654713	2.172	4
	594	Tb927.7.7330	hypothetical protein, conserved	47.401	4.9	0	1	-0.0194359	0.381645	2.4	1	1	0.80915	-0.091971	4.7557	2	2.4	1	1	0.87498	-0.0580019	15.67	2	2.4	1	1	1.23499	0.0916651		1
	344	Tb927.11.6200;Tb927.11.6180	60S ribosomal protein L28, putative	16.861	30.1	0	2	-0.0151893	0.38238	21.9	3	3	0.79061	-0.102038	1.7835	3	30.1	4	4	1.1068	0.0440692	23.476	4	9.6	1	1	1.02897	0.0124008		1
	470	Tb927.4.470	snoRNP protein GAR1, putative	21.783	40.2	0	1	-0.0249581	0.382586	40.2	6	6	0.73479	-0.133837	4.5732	6	24	4	4	0.88127	-0.054891	10.246	4	40.2	6	6	1.29973	0.113853	7.0447	8
	399	Tb927.2.4710	RNA-binding protein, putative (TRRM1)	49.983	7.9	0	1	0.0188663	0.384247	3.9	1	1	0.89624	-0.0475757	12.591	2	7.9	3	3	0.94162	-0.0261243	18.024	3	6.1	2	2	1.34989	0.130299	3.4989	2
	633	Tb927.8.6060	2-amino-3-ketobutyrate coenzyme A ligase, putative,glycine acetyltransferase, putative	43.734	8.9	0	1	0.0162956	0.384893	3.5	1	1	0.8839	-0.0535969		1	8.9	4	4	0.98282	-0.00752601	4.229	4	3.5	1	1	1.28828	0.11001		1
	243	Tb927.11.10140	hypothetical protein, conserved	30.3	16	0	1	-0.0330354	0.385291	11.2	2	2	0.70067	-0.154486		1	11.5	2	2	0.77989	-0.107967	29.7	2	16	3	3	1.45662	0.163347	12.632	3
	298	Tb927.11.16730	dihydrolipoyl dehydrogenase (GCVL-2)	50.433	10.9	0	1	-0.0190492	0.385844	2.5	1	1	0.76617	-0.115675	0.50808	2	6.5	3	3	0.94505	-0.0245452	3.2065	4	10.9	5	5	1.2108	0.0830725	6.6986	6
	428	Tb927.3.3580	heat shock protein 90, putative,lipophosphoglycan biosynthetic protein, putative,glucose regulated protein 94, putative (LPG3)	87.766	7	0	1	0.0106637	0.38651	1	1	1	0.90849	-0.0416798		1	4.3	2	2	1.009	0.00389117	1.6229	2	2.7	1	1	1.1743	0.0697796		1
	596	Tb927.7.7460	hypothetical protein, conserved	22.358	30.2	0	1	-0.0167751	0.386761	23.4	3	3	0.79894	-0.0974858	14.211	3	29.2	4	4	0.93224	-0.0304723	4.6462	3	30.2	4	4	1.19573	0.0776327	12.286	5
	272	Tb927.11.14090	hypothetical protein, conserved	51.674	5.2	0	1	-0.019241	0.387297	5.2	1	1	0.78457	-0.105368		1	5.2	1	1	0.90045	-0.0455404		1	5.2	1	1	1.23933	0.0931857		1
	353	Tb927.11.6610	hypothetical protein, conserved	40.25	3.8	0	1	-0.0310697	0.387643	3.8	1	1	0.73316	-0.134801	4.1951	2	3.8	1	1	0.76276	-0.117612	17.816	2	3.8	1	1	1.44279	0.159204		1
	566	Tb927.7.330	hypothetical protein	21.139	5.2	0	1	0.010785	0.389392	5.2	1	1	0.95721	-0.0189928		1	5.2	1	1	1.0979	0.0405628		1	0	0	0				0
	645	Tb927.8.760;Tb927.8.740	nucleolar RNA-binding protein (Nopp44/46)	35.042	16.8	0	2	-0.0198657	0.390148	9.5	2	2	0.75064	-0.124568	8.4544	3	12.5	3	3	0.94135	-0.0262489	18.089	5	16.8	4	4	1.23373	0.0912202	3.9587	7
	371	Tb927.11.8200	ribosomal protein S26, putative	12.806	17.1	0	1	-0.0137818	0.390913	7.2	1	1	0.82292	-0.0846424		1	17.1	2	2	0.94987	-0.0223358	3.0351	2	9.9	1	1	1.16314	0.0656329	5.8737	2
	670	Tb927.9.12510	ATP-dependent DEAD/H RNA helicase, putative (DED1)	82.74	37.7	0	1	-0.0231754	0.391499	37.7	24	23	0.74689	-0.126743	7.3145	23	36.3	23	22	0.86643	-0.0622665	12.196	24	28	18	18	1.31669	0.119484	8.3307	26
	300	Tb927.11.16760	T-complex protein 1, alpha subunit, putative (TCP-1-alpha)	54.623	10.1	0	1	0.0242594	0.392005	6.7	3	3	0.89533	-0.0480169	10.183	2	5.5	2	2	0.8741	-0.0584389	2.6518	2	6.7	3	3	1.51089	0.179234	11.767	2
	151	Tb927.10.15180	nucleosome assembly protein, putative	41.302	6.3	0	1	-0.0776098	0.392484	3	1	1	0.99344	-0.00285836		1	3	1	1	0.28721	-0.5418		1	6.3	2	2	2.05036	0.311829	73.768	2
	507	Tb927.6.1470	hypothetical protein, conserved	27.521	13	0	1	0.0352084	0.392891	0	0	0				0	4	1	1	0.86011	-0.065446		1	9	2	2	1.3673	0.135863	24.856	2
	394	Tb927.2.380;Tb927.2.400;Tb927.2.280;Tb11.v5.0594;Tb11.v5.0533;Tb927.4.210;Tb927.10.110	retrotransposon hot spot protein 2 (RHS2), putative	90.713	13.9	0	7	-0.0218453	0.392927	8.4	5	4	0.72946	-0.136999	17.082	5	11.5	8	7	0.92339	-0.0346148	7.8322	5	8.2	5	4	1.27667	0.106077	8.8109	5
	33	Tb927.5.4420;Tb05.5K5.70	nucleolar RNA helicase II, putative,nucleolar RNA helicase Gu, putative	68.786	28.3	0	2	-0.0165445	0.393007	27.1	12	12	0.80267	-0.095463	15.136	13	21	10	10	0.91324	-0.0394151	10.24	10	21.8	9	9	1.21687	0.0852444	10.339	11
	479	Tb927.5.1210	short-chain dehydrogenase, putative	33.876	26.4	0	1	0.0332938	0.393327	11.9	3	3	0.86635	-0.0623066	21.042	3	0	0	0				0	17.7	4	4	1.34553	0.128894	8.9725	4
	306	Tb927.11.1980	zinc finger protein family member, putative (ZC3H41)	58.459	5.4	0	1	-0.0227068	0.393696	1.5	2	2	0.7472	-0.126563	8.5386	2	1.5	2	2	0.86778	-0.0615904	3.4549	2	5.4	3	3	1.31836	0.120033	5.555	4
	528	Tb927.6.4440	RNA-binding protein 42 (RNA-binding motif protein 42) (RBP42)	37.718	6.5	0	1	0.0250564	0.393793	0	0	0				0	6.5	2	2	0.89695	-0.0472318	7.5668	2	2.6	1	1	1.25125	0.0973445		1
	364	Tb927.11.7510;Tb927.11.7460	glucose-regulated protein 78, putative,luminal binding protein 1 (BiP), putative	71.434	6.7	0	2	-0.0173121	0.394318	6.1	4	4	0.82573	-0.0831619	12.359	3	6.1	4	4	0.86269	-0.0641452	6.4833	5	3.4	3	3	1.24558	0.095371	4.6591	3
	459	Tb927.4.3060	hypothetical protein, conserved	17.732	30.4	0	1	-0.0255217	0.394887	25.7	4	4	0.70904	-0.149329	9.8491	4	25.7	4	4	0.86742	-0.0617706	5.65	4	12.2	2	2	1.36312	0.134535	12.081	2
	144	Tb927.10.14840;Tb927.10.14830;Tb927.10.14820	Mitochondrial ADP/ATP carrier protein 5a, putative (MCP5a)	34.074	25.4	0	3	-0.0194684	0.394904	14.7	4	4	0.77888	-0.108529	10.459	3	21.8	5	5	0.8818	-0.0546299	18.931	6	12.7	3	3	1.27278	0.104754	12.618	3
	448	Tb927.4.1800;Tb927.4.1790	ribosomal protein L3, mitochondrial, putative	48.691	21.2	0	2	-0.0178984	0.395233	11.4	4	4	0.77488	-0.110766	10.111	4	15.9	7	7	0.92325	-0.0346807	7.1354	5	11.7	3	3	1.23524	0.091751	10.289	4
	93	Tb927.1.2210	hypothetical protein, conserved	35.904	5.3	0	1	-0.0357488	0.39671	2.5	1	1	0.72107	-0.142023		1	0	0	0				0	2.8	1	1	1.17632	0.0705249		1
	616	Tb927.8.3530	glycerol-3-phosphate dehydrogenase [NAD+], glycosomal	37.805	26.8	0	1	-0.0162075	0.396711	9	3	3	0.77771	-0.109182	6.6456	3	18.6	5	5	0.95883	-0.0182584	20.736	5	11	3	3	1.199	0.0788183	4.2507	3
	437	Tb927.3.5050	60S ribosomal protein L4	41.856	26.2	0	1	-0.0205994	0.397155	18.4	7	7	0.73969	-0.13095	4.8556	8	21.1	8	8	0.91611	-0.0380524	15.237	9	11.8	4	4	1.27998	0.107204	1.5726	3
	724	Tb927.9.8950	CAAX prenyl protease 1, putative,metallo- peptidase, Clan M- Family M48	48.904	2.3	0	1	0.018788	0.398003	2.3	1	1	1.1896	0.075401		1	2.3	1	1	0.91659	-0.0378249	7.2646	2	0	0	0				0
	640	Tb927.8.6760	IgE-dependent histamine-releasing factor, putative	19.35	22.4	0	1	-0.02815	0.398918	22.4	2	1	0.64095	-0.193176		1	22.4	2	1	0.92883	-0.0320638		1	17.1	1	1	1.3829	0.14079		1
	41	Tb927.6.4980;Tb11.0390;Tb11.0290	40S ribosomal protein S14 (RPS14)	15.513	16.7	0	3	0.0290752	0.399213	16.7	2	2	0.80965	-0.0917027	15.056	3	16.7	2	2	0.89459	-0.048376	43.885	3	16.7	2	2	1.68774	0.227304	47.191	2
	304	Tb927.11.1900	T-complex protein 1, beta subunit, putative	58.057	10.8	0	1	0.0205886	0.399355	6.6	3	3	0.821	-0.0856568	7.2789	3	7.9	4	4	0.98294	-0.00747299	15.262	4	9.5	4	4	1.42855	0.154896	7.3639	4
	433	Tb927.3.4890	ubiquinone biosynthesis protein COQ7 homolog, putative	22.874	11.8	0	1	0.00669044	0.39946	5.4	1	1	0.92076	-0.0358536		1	11.8	2	2	1.1049	0.043323	9.196	2	11.8	2	2	1.02944	0.0126019	3.9245	2
	59	Tb927.7.4570;Tb11.v5.0270	inosine-guanine nucleoside hydrolase (IG-NH)	39.39	10.9	0	2	0.0120565	0.399559	2.8	1	1	0.86987	-0.0605456		1	10.9	2	2	1.031	0.0132587	5.4814	2	8.1	1	1	1.21187	0.0834566		1
	184	Tb927.10.4000	methylglutaconyl-CoA hydratase, mitochondrial precursor, putative	29.195	19.5	0	1	0.0166418	0.400527	6.9	2	2	0.85052	-0.0703155	18.171	2	11.9	2	2	0.98564	-0.00628168	5.1487	2	7.2	2	2	1.3382	0.126522	16.398	2
	489	Tb927.5.2780	mitochondrial DNA polymerase beta	46.102	4.7	0	1	0.0276779	0.400682	0	0	0				0	4.7	2	2	0.87472	-0.0581309	1.2193	2	2.7	1	1	1.29863	0.113487		1
	339	Tb927.11.5650	replication factor C, subunit 1, putative,replication factor C large subunit, putative	65.046	5.1	0	1	-0.0218897	0.40194	5.1	2	2	0.77157	-0.112625	14.937	2	5.1	2	2	0.82202	-0.0851176	13.9	2	3.4	1	1	1.35542	0.132073		1
	663	Tb927.9.11410;Tb927.9.11380	unspecified product	14.962	27.3	0	2	-0.0159206	0.402084	12.9	2	2	0.77877	-0.108591	1.4602	2	12.9	2	2	0.94363	-0.0251983	1.8426	2	20.1	3	3	1.21907	0.0860273	7.9925	3
	647	Tb927.8.900	splicing factor TSR1 (TSR1)	37.469	13.1	0	1	-0.0252309	0.402718	7.3	2	2	0.70909	-0.149299	3.5633	3	9.8	3	3	0.83945	-0.0760052	3.071	4	3.4	1	1	1.41127	0.149611		1
	254	Tb927.11.11520	glycosomal membrane protein (PEX11)	24.027	9.6	0	1	-0.0125658	0.404047	9.6	2	2	0.82657	-0.0827204	10.771	2	9.6	2	2	0.9386	-0.0275195	6.8917	3	5	1	1	1.1818	0.0725424		1
	157	Tb927.10.1630	atp-binding cassette sub-family e member 1 (ABCE1)	71.078	7.8	0	1	-0.0206424	0.404709	2.7	2	2	0.76531	-0.116163	11.627	2	5.5	4	4	0.84439	-0.0734569	12.708	3	5.1	3	3	1.34181	0.127692	12.43	3
	192	Tb927.10.4570;Tb927.10.4560	elongation factor 2	94.333	32.6	0	2	-0.0202564	0.405253	11.9	7	7	0.72578	-0.139195	13.374	7	22.9	12	12	0.91686	-0.037697	10.55	13	25.7	14	14	1.30654	0.116123	9.41	20
	452	Tb927.4.2040;Tb927.4.2030	ALBA-Domain Protein (ALBA3)	20.808	44.2	0	2	-0.0164809	0.405349	43.7	6	6	0.78368	-0.105861	14.368	8	37.9	5	5	0.90721	-0.0422922	11.759	5	33.2	5	5	1.25519	0.0987106	8.9244	5
	699	Tb927.9.4210;Tb927.9.4230;Tb11.v5.0561;Tb927.9.4200	fatty acyl CoA synthetase 3 (ACS3)	77.853	13.4	0	4	-0.0210369	0.405657	3.6	3	3	0.71376	-0.146448	4.5673	3	8	6	6	0.91837	-0.0369823	11.068	5	9.4	6	6	1.31923	0.120319	9.5252	6
	137	Tb927.10.1450	hypothetical protein, conserved	329.64	7.5	0	1	0.0325002	0.406333	0	0	0				0	7.5	1	1	0.8419	-0.0747395		1	7.5	1	1	1.37956	0.13974		1
	260	Tb927.11.11830;Tb927.11.11820	40S ribosomal protein S17, putative	16.222	12.7	0	2	0.0179102	0.40658	5.6	1	1	0.83824	-0.0766316		1	5.6	2	2	0.96372	-0.0160491	3.5419	2	7	1	1	1.40091	0.146411		1
	522	Tb927.6.3650	ADP-ribosylation factor, putative	20.072	4.9	0.004644	1	0.0288766	0.40687	0	0	0				0	4.9	1	1	0.85706	-0.0669888		1	4.9	1	1	1.33273	0.124742		1
	247	Tb927.11.10910;Tb927.11.10790	40S ribosomal protein SA, putative	27.609	10.2	0	2	-0.0219818	0.40711	3.3	1	1	0.72405	-0.140231		1	10.2	2	2	0.86738	-0.0617906		1	3.3	1	1	1.36797	0.136077		1
	490	Tb927.5.2930	hypothetical protein, conserved	43.308	10.5	0	1	-0.0177163	0.407722	7.8	2	2	0.73033	-0.136481	11.892	2	10.5	3	3	0.97501	-0.0109909	17.757	3	7.8	2	2	1.24258	0.0943228	2.9316	3
	484	Tb927.5.2080	guanosine monophosphate reductase, putative	52.238	1.6	0.0045317	1	-0.0144059	0.408683	1.6	1	1	0.80901	-0.0920461		1	1.6	1	1	0.90642	-0.0426705		1	1.6	1	1	1.23452	0.0914989		1
	249	Tb927.11.10860	hypothetical protein, conserved	47.301	10.6	0	1	0.0215738	0.408862	0	0	0				0	7.6	3	3	0.88776	-0.0517044	2.9235	3	5.6	2	2	1.24409	0.094852	8.4192	2
	85	Tb927.10.2110;Tb927.10.2100;Tb11.v5.1046;Tb927.10.2090	elongation factor 1-alpha (TEF1)	49.105	55.2	0	4	-0.0157839	0.408891	43.7	14	14	0.7895	-0.102648	16.937	21	49	17	17	0.90237	-0.0446154	8.7877	22	43.7	13	13	1.25867	0.0999116	6.8805	19
	368	Tb927.11.7850	hypothetical protein, conserved	19.449	22	0	1	0.0127475	0.409214	4	1	1	0.93169	-0.0307286		1	0	0	0				0	22	4	4	1.13821	0.0562236	27.537	4
	644	Tb927.8.7570	tRNA-dihydrouridine synthase 1, putative	58.145	1.7	0.0016026	1	0.0453614	0.409525	1.7	1	1	0.77641	-0.109909		1	1.7	1	1	1.5872	0.200632		1	0	0	0				0
	639	Tb927.8.6750	translationally controlled tumor protein (TCTP), putative	19.265	27.1	0	1	-0.0191199	0.410501	22.4	2	1	0.73335	-0.134689		1	27.1	3	2	0.90727	-0.0422634	1.1467	2	21.8	2	2	1.31702	0.119592	5.7278	2
	635	Tb927.8.6170	transketolase, putative (TK)	72.609	6.6	0	1	0.0325939	0.411813	0	0	0				0	4.6	3	3	0.82789	-0.0820274	18.67	3	1.9	1	1	1.40351	0.147215	2.6632	2
	624	Tb927.8.4810	prohibitin 1 (PHB1)	31.429	10.5	0	1	-0.0101458	0.412894	3.2	1	1	0.85362	-0.0687354		1	10.5	3	3	0.93451	-0.029416	7.6738	3	3.2	1	1	1.16873	0.067714		1
	232	Tb927.10.850	hypothetical protein, conserved	168.3	8.4	0	1	-0.01377	0.413129	4.4	5	5	0.82638	-0.0828202	22.546	5	4.5	5	5	0.88344	-0.0538229	30.256	4	6.4	5	5	1.24547	0.0953331	11.392	7
	423	Tb927.3.2960	inosine-adenosine-guanosine-nucleosidehydrolase,IAG-nucleoside hydrolase (IAGNH)	35.848	9.8	0	1	0.0140814	0.413304	0	0	0				0	9.8	2	2	0.91974	-0.0363349	8.2194	2	9.8	2	2	1.16011	0.0644978	17.275	3
	376	Tb927.11.9130	replication factor A, 51kDa subunit, putative	52.331	10.2	0	1	-0.0098147	0.41422	8.2	2	2	0.82984	-0.0810056	10.882	3	8.2	2	2	0.98796	-0.00526064	5.2032	3	10.2	3	3	1.13978	0.0568222	9.9362	3
	526	Tb927.6.4300;Tb927.6.4280;Tb927.10.6880;Tb11.v5.0516	glyceraldehyde 3-phosphate dehydrogenase, glycosomal (GAPDH)	39.047	41.2	0	4	-0.0209959	0.414557	21.4	7	7	0.70736	-0.15036	9.8732	7	28.7	9	9	0.88424	-0.0534298	19.512	10	33.7	9	9	1.38293	0.140802	7.1942	11
	659	Tb927.9.11050	4E-interacting protein, putative	58.54	4.8	0	1	-0.0130384	0.41457	4.8	2	2	0.79359	-0.100404	2.3564	4	4.8	2	2	0.95094	-0.0218469	8.6631	3	4.8	2	2	1.21098	0.0831356	15.603	5
	673	Tb927.9.12730	chaperone protein DNAj, putative	48.592	20.2	0	1	-0.0193414	0.415132	20.2	7	7	0.73118	-0.135976	5.5274	9	16.9	6	6	0.88233	-0.054369	5.8987	9	12.9	4	4	1.35619	0.13232	6.229	6
	233	Tb927.10.8540	chaperone protein DNAj, putative	36.435	2.4	0	1	-0.0363247	0.415555	2.4	1	1	0.67605	-0.170021		1	0	0	0				0	2.4	1	1	1.25133	0.0973717		1
	180	Tb927.10.3640	hypothetical protein, conserved	31.534	3.9	0	1	-0.0139329	0.415988	3.9	1	1	0.86002	-0.0654914		1	3.9	1	1	1.0905	0.0376257		1	0	0	0				0
	120	Tb927.10.11970	glutamine aminotransferase (GlnAT) (GlnAT)	48.334	33.1	0	1	0.00927973	0.41661	19.3	5	5	0.87111	-0.059927	9.4007	4	26.8	7	7	1.0316	0.0135113	7.926	5	19.8	6	6	1.18646	0.0742549	10.417	5
	476	Tb927.5.1080	RNA-binding protein, putative (RBP22)	26.869	16.5	0	1	-0.0145738	0.417553	11	2	2	0.74665	-0.126883	6.0126	3	7.2	1	1	0.99438	-0.00244762		1	5.5	1	1	1.21789	0.0856092		1
	72	Tb927.10.2890;Tb11.v5.0650	enolase	46.592	48.3	0	2	-0.0099486	0.417561	7.5	2	2	0.85973	-0.0656379	9.0601	2	42.4	11	11	0.91885	-0.0367554	7.8128	10	29.8	9	9	1.18181	0.0725475	6.9854	8
	383	Tb927.11.9700	nascent polypeptide associated complex alpha subunit, putative	11.406	27.7	0	1	-0.187122	0.420018	18.8	2	2	0.6067	-0.217026		1	6.9	1	1	0.025932	-1.58616		1	15.8	2	2	17.4511	1.24182	391.9	2
	141	Tb927.10.14750;Tb927.10.14630	fibrillarin, putative	31.672	27	0	2	-0.0146401	0.420373	27	8	8	0.78948	-0.102659	13.704	14	20.1	6	6	0.88812	-0.0515283	11.313	6	20.4	5	5	1.28904	0.110267	12.717	6
	149	Tb927.2.5910;Tb927.10.15120	40S ribosomal protein S13, putative	17.309	16.6	0	2	0.00882699	0.42048	11.9	3	3	0.85898	-0.0660169	14.039	3	11.9	3	3	1.0687	0.0288558	7.7736	3	15.9	3	3	1.15782	0.0636421	2.0989	3
	608	Tb927.8.2000	cyclophilin, putative,cyclophilin type peptidyl-prolyl cis-trans isomerase, putative,peptidyl-prolyl cis-trans isomerase, putative (NCP1)	28.482	15.3	0	1	-0.0138711	0.421473	3.4	1	1	0.83862	-0.0764348		1	7.3	2	2	0.84206	-0.074657	2.3688	2	8	2	2	1.2867	0.109478	4.2523	2
	292	Tb927.5.1110;Tb927.11.16280	60S ribosomal protein L2, putative,60S ribosomal protein L8, putative	28.314	25.8	0	2	-0.0119894	0.421595	16.9	8	8	0.79847	-0.0977414	10.666	8	25	7	7	0.94573	-0.0242328	4.5958	7	17.3	4	4	1.21901	0.0860061	10.699	4
	176	Tb927.10.3210	delta-1-pyrroline-5-carboxylate dehydrogenase, putative	62.036	21.2	0	1	-0.0108394	0.421605	5.7	3	3	0.82169	-0.085292	5.8497	2	16.4	8	8	0.94002	-0.0268629	11.987	9	17.8	8	8	1.20126	0.0796366	35.244	7
	538	Tb927.6.720;Tb927.11.11230	40S ribosomal protein L14, putative	21.443	23.8	0	2	-0.0187631	0.422632	19	4	4	0.73219	-0.135376	10.989	3	23.8	6	6	0.85725	-0.0668925	13.221	8	10.6	2	2	1.39952	0.14598	15.76	2
	209	Tb927.10.6070	universal minicircle sequence binding protein (UMSBP), putative,predicted zinc finger protein	14.566	56.4	0	1	-0.0151738	0.423056	47.1	5	4	0.77315	-0.111736	6.0573	6	56.4	6	5	0.88713	-0.0520127	4.4706	6	56.4	6	5	1.31289	0.118227	7.9306	11
	238	Tb927.10.9440	NADH dehydrogenase (54 NDH2)	54.351	9.6	0	1	-0.0164146	0.423484	3.1	2	2	0.78062	-0.10756	4.4827	2	3.1	2	2	0.84351	-0.0739098	4.7722	2	9.6	4	4	1.3559	0.132226	5.4019	4
	112	Tb927.10.1090;Tb927.10.1080	40S ribosomal protein S23, putative (RPS23)	15.928	26.6	0	2	0.0111497	0.423899	7.7	1	1	0.81883	-0.0868063		1	26.6	2	2	1.0822	0.0343075	4.1202	2	18.9	1	1	1.21884	0.0859479		1
	612	Tb927.8.2740	mitochondrial RNA binding protein (TbRBP38)	38.497	23.4	0	1	-0.0133427	0.425259	2.1	1	1	0.8144	-0.0891622		1	23.4	5	5	0.86837	-0.0612952	2.7627	5	12.7	2	2	1.28952	0.110429	6.5427	2
	602	Tb927.8.1270	conserved protein	53.545	10.1	0	1	0.0281734	0.426118	7.4	3	3	0.79805	-0.0979699	10.113	3	7.4	3	3	0.77226	-0.112236	4.1916	3	7.6	3	3	1.97118	0.294727	33.702	3
	406	Tb927.2.820;Tb11.v5.0670;Tb927.4.100	retrotransposon hot spot protein (RHS, pseudogene), putative,retrotransposon hot spot protein 1 (RHS1), interrupted	60.527	4.6	0	3	-0.0119867	0.426144	2.1	1	1	0.79022	-0.102252	3.0963	2	2.1	1	1	0.94092	-0.0264473	0.87019	2	4.6	2	2	1.23805	0.0927392	2.7139	2
	697	Tb927.9.4080	conserved protein	142.13	3.5	0	1	-0.011215	0.426844	2.6	2	2	0.81737	-0.0875813	1.8327	2	1.4	1	1	0.91574	-0.0382278		1	2.3	2	2	1.23641	0.0921642	5.1733	2
	420	Tb927.3.2230	succinyl-CoA synthetase alpha subunit, putative	31.464	35.5	0	1	-0.0123768	0.427324	20.9	4	4	0.77092	-0.112991	8.7533	4	35.5	7	7	0.96088	-0.0173308	9.5581	8	29.9	5	5	1.23934	0.093191	16.424	6
	307	Tb927.11.2060;Tb927.11.2050	60S acidic ribosomal subunit protein, putative	34.627	30.6	0	2	-0.0131744	0.427451	9.3	4	4	0.78156	-0.107038	16.196	4	27.8	6	6	0.91119	-0.0403911	18.35	6	9.3	3	3	1.28205	0.107905	8.5495	4
	54	Tb927.10.6060;Tb11.v5.0199	universal minicircle sequence binding protein (UMSBP), putative,DNA-binding protein HEXBP, putative,zinc finger protein	21.836	58.2	0	2	-0.0130066	0.427831	52.1	5	4	0.75789	-0.120394	12.371	4	48.8	5	4	0.96258	-0.0165632	4.0598	5	58.2	6	5	1.25296	0.0979372	2.5758	10
	287	Tb927.11.15900;Tb927.11.15880	60S ribosomal protein L27, putative	15.581	29.3	0	2	-0.0129902	0.429456	19.5	4	4	0.78177	-0.106921	2.0009	5	29.3	5	5	0.90682	-0.0424789	5.8243	6	13.5	3	3	1.28952	0.110429	3.7856	3
	671	Tb927.9.12630;Tb927.9.12590;Tb927.9.12570;Tb927.9.12550;Tb927.9.12610	glycerol kinase, glycosomal (glk1)	56.426	30.9	0	5	-0.0133386	0.431187	15	5	5	0.76313	-0.117401	15.22	6	16.6	6	6	0.91873	-0.0368121	5.9944	7	25	7	7	1.30076	0.114198	19.065	10
	369	Tb927.11.7900	mitochondrial RNA binding protein 16 (RBP16)	15.118	57.4	0	1	-0.0132372	0.432445	51.8	4	4	0.76204	-0.118022	5.8647	5	57.4	7	7	0.91694	-0.0376591	14.94	12	39	5	5	1.30608	0.11597	16.13	6
	75	Tb927.10.2770;Tb11.v5.0684	eukaryotic translation initiation factor 5, putative	42.945	12	0	2	-0.0115464	0.43259	8.6	3	3	0.77039	-0.113289	45.037	3	9.4	3	3	0.96428	-0.0157968	9.3182	3	6	2	2	1.24293	0.094447	1.3555	2
	322	Tb927.11.3240	T-complex protein 1, zeta subunit, putative (TCP-1-zeta)	59.579	19.5	0	1	0.0140651	0.433203	8.6	2	2	0.79226	-0.101132	11.666	2	15.1	4	4	0.98131	-0.00819378	9.4041	4	12.9	5	5	1.41749	0.151521	7.7689	5
	159	Tb927.10.180	ATP synthase F1 subunit gamma protein, putative	34.37	12.5	0	1	0.00862432	0.433552	8.5	1	1	0.88144	-0.0548072		1	8.5	1	1	0.96356	-0.0161212		1	12.5	2	2	1.24969	0.0968015	5.6773	2
	605	Tb927.8.1510	ATP-dependent DEAD/H RNA helicase, putative (DBP2.1)	62.439	6.9	0	1	-0.0188173	0.433579	1.9	1	1	0.72887	-0.13735	9.0478	2	1.9	1	1	0.79892	-0.0974967	11.72	2	6.9	2	2	1.50798	0.178395	11.383	3
	166	Tb927.10.2530	adenylate kinase, putative	24.941	71.6	0	1	-0.0105058	0.433756	44.1	9	9	0.81108	-0.0909363	17.376	18	65.8	14	14	0.9189	-0.0367317	7.1367	22	65.3	14	14	1.24782	0.0961507	14.916	29
	654	Tb927.9.10520	hypothetical protein, conserved	29.587	4.7	0	1	0.0355204	0.434648	0	0	0				0	4.7	1	1	0.73274	-0.13505		1	4.7	1	1	1.60728	0.206091		1
	326	Tb927.11.3700	hypothetical protein, conserved	61.003	2.4	0	1	0.015943	0.434904	2.4	1	1	0.7171	-0.14442		1	2.4	1	1	1.104	0.0429691		1	2.4	1	1	1.4102	0.14928		1
	132	Tb927.11.9710;Tb927.10.13500	60S ribosomal protein L10a, putative (RPL10A)	24.597	24.8	0	2	-0.0108214	0.435102	10.7	2	2	0.77578	-0.110261	7.0483	3	24.8	4	4	0.96752	-0.01434	22.37	5	10.7	2	2	1.23634	0.0921374	1.8452	3
	595	Tb927.7.7430;Tb927.7.7420	ATP synthase alpha chain, mitochondrial precursor,ATP synthase F1, alpha subunit	63.502	3.3	0	2	-0.0108476	0.435684	3.3	2	2	0.76905	-0.114045		1	1.4	1	1	0.97885	-0.00928385		1	3.3	2	2	1.2325	0.0907864	5.6733	4
	336	Tb927.11.5440	malic enzyme	61.506	3.4	0	1	0.0262455	0.436017	0	0	0				0	3.4	2	2	0.78966	-0.10256	12.189	2	1.8	1	1	1.42906	0.155051		1
	163	Tb927.10.2240	hypothetical protein, conserved	66.352	8.2	0	1	-0.0112811	0.436592	8.2	5	5	0.79941	-0.0972304	4.7823	7	7	4	4	0.89814	-0.046656	4.4449	6	7	3	3	1.28838	0.110043	2.4257	4
	117	Tb927.9.6070;Tb927.10.11540	40S ribosomal protein S3, putative (RPS3)	24.216	34.1	0	2	-0.010741	0.43682	22.9	6	6	0.78244	-0.106549	9.1344	6	22.9	5	5	0.94553	-0.0243247	8.1812	5	22	4	4	1.25502	0.0986507	3.7209	4
	694	Tb927.9.3170	cytochrome oxidase subunit V (COXV)	22.229	12.2	0	1	-0.00592365	0.437527	5.1	1	1	0.92105	-0.0357168		1	12.2	2	2	1.0565	0.0238695	2.5147	2	0	0	0				0
	410	Tb927.3.1590	mitochondrial RNA binding complex 1 subunit (MRB1590)	72.678	4.2	0	1	-0.0128349	0.437602	1.5	1	1	0.75074	-0.12451		1	3	2	2	0.92013	-0.0361508	11.073	3	4.2	3	3	1.32482	0.122157	8.6109	3
	263	Tb927.11.13190;Tb927.11.13090	elongation factor 1 gamma, putative	46.275	20.8	0	2	-0.0113593	0.43781	6.2	2	2	0.79405	-0.100152	3.7075	2	15.6	5	5	0.89745	-0.0469897	5.2147	6	8.9	4	4	1.29737	0.113064	8.2328	4
	534	Tb927.6.5080	hypothetical protein, conserved	65.003	3.7	0	1	-0.0101222	0.438089	3.7	2	2	0.79036	-0.102175	8.3292	2	2.1	1	1	0.94758	-0.0233841		1	2.1	1	1	1.24507	0.0951925		1
	55	Tb927.5.295b;Tb11.v5.0214;Tb11.v5.0326	retrotransposon hotspot (RHS) protein 1	95.127	2.3	0	3	0.0106646	0.438404	1.1	1	1	0.81398	-0.0893863		1	1.1	1	1	1.0023	0.00099773		1	2.3	2	2	1.31942	0.120382	2.0637	2
	631	Tb927.8.5860	50S ribosomal protein L17, putative	35.06	8.6	0	1	0.0188421	0.43883	0	0	0				0	8.6	2	2	0.83561	-0.0779964	14.43	2	5.6	1	1	1.30521	0.115681		1
	44	Tb927.4.1100;Tb927.11.680;Tb11.0880	ribosomal protein L21E (60S), putative	18.015	13.2	0	3	-0.00942409	0.438865	0	0	0				0	4.4	1	1	0.87521	-0.0578877		1	8.8	1	1	1.09406	0.0390395		1
	195	Tb927.10.4870	tRNA-dihydrouridine synthase 2, putative	47.595	5.3	0	1	0.00543802	0.438899	5.3	1	1	0.89131	-0.0499712		1	5.3	1	1	1.019	0.00817418		1	5.3	1	1	1.14317	0.0581111		1
	295	Tb927.11.16550	Zinc finger protein, C3H1 type-like (ZC3H46)	56.434	4.9	0	1	0.0082347	0.439062	0	0	0				0	2.5	1	1	0.92416	-0.0342528		1	2.4	1	1	1.12389	0.0507222		1
	614	Tb927.8.3150	T-complex protein 1, gamma subunit, putative (TCP-1-gamma)	60.817	24.5	0	1	0.0124297	0.440301	11	3	3	0.80196	-0.0958473	8.7012	3	20.5	8	8	0.95836	-0.0184713	8.2118	8	16	7	7	1.41778	0.151608	7.2113	8
	582	Tb927.7.5540	2,4-dienoyl-coa reductase-like protein	80.352	4.4	0	1	-0.0169557	0.44075	2.5	2	2	0.73402	-0.134292	6.0611	2	2.5	2	2	0.79516	-0.0995455	26.066	2	3.2	2	2	1.52395	0.18297	0.08879	2
	385	Tb927.11.9750	hypothetical protein, conserved	72.849	11.9	0	1	-0.00817408	0.44205	10.2	6	6	0.80384	-0.0948304	5.2823	5	8.7	5	5	0.98531	-0.00642711	7.6662	6	8.7	5	5	1.19326	0.0767353	3.4784	4
	554	Tb927.7.240;Tb927.7.230	40S ribosomal protein S33, putative	11.17	11.7	0	2	0.00783959	0.442187	11.7	1	1	0.8644	-0.0632852		1	11.7	1	1	0.97397	-0.0114544		1	11.7	1	1	1.25389	0.0982584		1
	135	Tb927.10.14150;Tb11.v5.0606	nuclear segregation protein, putative	55.311	4.8	0	2	-0.0311158	0.442408	0	0	0				0	1.9	1	1	0.6292	-0.201211		1	2.9	1	1	1.37714	0.13898		1
	182	Tb927.11.14130;Tb927.10.3840	ribosomal protein L18, putative	20.904	36.9	0	2	-0.00911804	0.442682	18.4	4	4	0.79202	-0.101264	5.3038	3	29.1	6	6	0.95987	-0.0177876	3.3765	5	7.8	1	1	1.23509	0.0916973	1.8511	2
	586	Tb927.7.6090	hypothetical protein, conserved	88.162	12.9	0	1	-0.0118049	0.443352	8.4	8	8	0.75875	-0.119901	7.4689	10	11.7	10	10	0.90517	-0.0432698	5.8816	11	7.9	5	5	1.34201	0.127756	7.4136	3
	549	Tb927.7.2070	heat shock protein DNAJ, putative	36.377	17.7	0	1	-0.0122733	0.443788	15.2	3	3	0.7426	-0.129245	3.7158	4	6.1	2	2	0.91254	-0.0397481	7.0181	2	14.9	3	3	1.35573	0.132173	13.875	3
	281	Tb927.11.15040	chaperonin HSP60, mitochondrial precursor, putative,heat shock protein 60 (Cpn60)	64.159	2	0	1	-0.0134267	0.443831	2	1	1	0.71024	-0.148595		1	2	1	1	0.92858	-0.0321807		1	2	1	1	1.38196	0.140495		1
	271	Tb927.11.14000;Tb927.11.14020	NRBD1,p34 (NRBD1)	28.776	14.5	0	2	-0.00993846	0.443923	14.5	3	3	0.77161	-0.112602	20.528	3	14.5	3	3	0.95577	-0.0196466	9.7376	3	9.9	2	2	1.266	0.102433	3.3611	3
	431	Tb927.3.3940	RNA-binding protein, putative (DRBD11)	61.716	4.7	0	1	-0.00635083	0.444026	2	1	1	0.87933	-0.0558481		1	2	1	1	0.92103	-0.0357262		1	2.7	1	1	1.18174	0.0725218		1
	52	Tb927.7.5020;Tb927.7.5000;Tb11.v5.0182;Tb11.v5.0181	60S ribosomal protein L19, putative	29.408	3.5	0	4	-0.00922922	0.444209	3.5	1	1	0.81689	-0.0878364		1	3.5	1	1	0.90347	-0.0440863		1	3.5	1	1	1.27126	0.104235		1
	626	Tb927.8.5120	cytochrome c	12.3	10.5	0	1	-0.0124001	0.444329	9.6	1	1	0.75333	-0.123015		1	9.6	1	1	0.88512	-0.0529978		1	10.5	2	2	1.37661	0.138812	8.79	2
	535	Tb927.6.5110	damage-specific DNA binding protein, putative	138.21	1.5	0	1	0.00746215	0.445384	1.5	1	1	1.0054	0.00233888		1	1.5	1	1	0.84523	-0.0730251		1	1.5	1	1	1.239	0.0930727		1
	127	Tb927.10.12700	pyruvate dehydrogenase E1 alpha subunit, putative	42.511	24.3	0	1	-0.0123257	0.446338	18	8	8	0.75712	-0.120835	9.2378	9	21.7	9	9	0.86769	-0.0616354	8.6439	9	11.9	6	6	1.39796	0.145494	4.4633	6
	221	Tb927.10.7570;Tb11.v5.0774	dihydrolipoamide acetyltransferase E2 subunit, putative	48.107	19.1	0	2	0.00935302	0.446514	8.4	3	3	0.93003	-0.031503	15.781	2	5.3	2	2	0.84989	-0.0706373	1.2936	2	12	3	3	1.34958	0.130199	7.904	3
	259	Tb927.11.11780	acyl-CoA dehydrogenase, putative	66.634	2	0	1	0.00843015	0.44711	2	1	1	0.86413	-0.0634209		1	2	1	1	0.93297	-0.0301323		1	2	1	1	1.31475	0.118844		1
	203	Tb927.10.5770	valosin-containing protein homolog,Transitional endoplasmic reticulum ATPase, putative (VCP)	85.825	2.1	0	1	0.0161861	0.447343	0	0	0				0	1	1	1	0.8303	-0.080765		1	1	1	1	1.29759	0.113137		1
	162	Tb927.10.6370;Tb927.10.220	60S ribosomal proteins L37, putative	10.458	25.8	0	2	-0.00776408	0.447811	18.3	2	2	0.80455	-0.094447	11.723	2	18.3	2	2	0.96571	-0.0151533	3.8075	2	16.1	2	2	1.21985	0.086308	2.7344	2
	310	Tb927.11.2250	hypothetical protein, conserved	26.94	18.7	0	1	0.00755292	0.448071	18.7	3	3	0.8085	-0.09232	0.64417	3	13.7	2	2	1.0923	0.0383419	12.754	3	7.5	1	1	1.19299	0.0766368		1
	101	Tb927.1.4230	hypothetical protein, conserved	49.86	2.6	0.005772	1	0.00810968	0.449205	2.6	1	1	0.88529	-0.0529144		1	2.6	1	1	0.90567	-0.04303		1	2.6	1	1	1.31909	0.120274	15.645	2
	80	Tb11.v5.0810;Tb927.6.4590	glutamyl-tRNA synthetase, putative	53.532	4.7	0	2	-0.0162063	0.449681	0	0	0				0	1.9	1	1	0.76231	-0.117868		1	2.8	1	1	1.21746	0.0854559		1
	324	Tb927.11.3510	hypothetical protein, conserved	91.938	1.4	0.003125	1	0.0138513	0.449776	0	0	0				0	1.4	1	1	0.84488	-0.073205		1	1.4	1	1	1.26156	0.100908		1
	722	Tb927.9.8740	RNA-binding protein (DRBD3)	36.984	10.7	0	1	-0.00721646	0.449861	10.7	4	4	0.81293	-0.0899468	8.1619	5	7.3	2	2	0.9629	-0.0164188	6.051	3	8	2	2	1.21539	0.0847163	9.8085	3
	705	Tb927.9.5730	nucleosome assembly protein-like protein	47.584	20.4	0	1	-0.010253	0.450144	18.7	4	4	0.7793	-0.108295	9.5798	5	17.1	3	3	0.88432	-0.0533906	5.0091	4	20.4	5	5	1.35184	0.130927	1.682	6
	679	Tb927.9.13580	hypothetical protein, conserved	48.929	12.8	0	1	0.00796417	0.450244	6.2	3	3	0.81568	-0.0884802	4.8377	3	10	4	4	1.0135	0.00582375	11.41	3	4.7	2	2	1.27805	0.106549	8.6542	2
	86	Tb927.11.3600;Tb927.11.3590;Tb11.v5.1059	40S ribosomal protein S4, putative	30.644	22.7	0	3	0.0049636	0.450472	11.4	3	3	0.88612	-0.0525075	17.688	4	10.6	3	3	0.99612	-0.00168834	15.151	4	22.7	7	7	1.17243	0.0690866	6.1102	9
	357	Tb927.11.6870	14-3-3 protein	29.196	6	0	1	0.0210957	0.450596	0	0	0				0	6	1	1	0.76961	-0.113729		1	6	1	1	1.43193	0.155921		1
	472	Tb927.8.7470;Tb927.4.4950	hypothetical protein, conserved	61.342	4.2	0	2	-0.0193175	0.451026	2.5	1	1	0.71799	-0.143882		1	0	0	0				0	1.8	1	1	1.27423	0.105247		1
	719	Tb927.9.8130;Tb927.9.8100	nascent polypeptide associated complex subunit, putative	20.129	9.6	0	2	0.0133387	0.45164	9.6	1	1	0.84376	-0.0737811		1	0	0	0				0	9.6	1	1	1.26026	0.100459		1
	523	Tb927.6.3800;Tb927.6.3750;Tb927.6.3740	heat shock 70 kDa protein, mitochondrial precursor, putative	71.474	42.2	0	3	0.00972986	0.451876	16.6	9	9	0.83064	-0.0805872	5.2044	9	38.2	16	16	0.91129	-0.0403434	9.6716	16	26.5	10	10	1.41293	0.15012	10.852	15
	296	Tb927.11.1660	vesicular transport protein (CDC48 homologue), putative	73.318	3.8	0	1	-0.0123722	0.451922	3.8	1	1	0.71563	-0.145311		1	3.8	1	1	0.88627	-0.052434		1	3.8	1	1	1.44753	0.160629		1
	696	Tb927.9.3990;Tb927.9.3920	ribosomal protein S7, putative	23.841	20.8	0	2	-0.00604814	0.452124	17.3	3	3	0.83654	-0.0775133	6.4443	3	17.3	3	3	0.96353	-0.0161348	2.7783	3	20.8	4	4	1.18988	0.0755036	4.0816	5
	66	Tb927.10.3940;Tb927.10.3930;Tb11.v5.0501	40S ribosomal protein S3A, putative	29.422	8.2	0	3	-0.00673232	0.452204	3.5	1	1	0.78917	-0.102829		1	8.2	2	2	1.0476	0.0201955	6.8522	2	3.5	1	1	1.15461	0.062437		1
	709	Tb927.9.6270	hypothetical protein, conserved	57.132	3	0	1	-0.00685964	0.452265	3	1	1	0.82277	-0.0847216		1	3	1	1	0.94658	-0.0238427		1	3	1	1	1.22457	0.0879853		1
	62	Tb927.11.3650;Tb11.v5.0435	adenylosuccinate synthetase, putative	66.674	4.5	0	2	0.00957436	0.452841	0	0	0				0	4.5	3	3	0.88191	-0.0545757	1.7718	2	1.5	1	1	1.18502	0.0737245		1
	685	Tb927.9.15150;Tb927.9.15110	unspecified product	34.636	13	0	2	-0.00938039	0.453326	7.8	3	3	0.78055	-0.107599	6.3431	3	13	4	4	0.89439	-0.0484731	8.2982	5	10.7	3	3	1.34255	0.127931	5.1722	4
	333	Tb927.11.4700	prostaglandin f synthase	30.992	6.5	0	1	-0.00844862	0.453584	3.3	1	1	0.78311	-0.106177		1	3.3	1	1	0.9303	-0.031377		1	6.5	2	2	1.29482	0.112208	0.3314	2
	216	Tb927.10.6970;Tb927.10.6940	dipeptidyl-peptidase 8-like serine peptidase,serine peptidase, Clan SC, Family S9B	93.683	1.8	0	2	0.00778158	0.45445	1.8	1	1	0.83217	-0.0797879		1	1.8	1	1	0.95529	-0.0198648	7.8945	2	1.8	1	1	1.32739	0.122997		1
	577	Tb927.7.4620	hypothetical protein, conserved	32.677	8.7	0	1	0.0140701	0.455452	4	1	1	0.69779	-0.156275		1	4	1	1	0.94483	-0.0246463		1	4.7	1	1	1.6716	0.223132		1
	503	Tb927.5.930;Tb11.v5.0613;Tb927.10.3650	NADH-dependent fumarate reductase (FRDg)	123.69	15.6	0	3	-0.00717527	0.455868	10.2	7	3	0.78028	-0.10775	8.671	3	13.1	10	4	0.99011	-0.00431655	3.6174	3	11.7	9	4	1.2318	0.0905403	4.6277	4
	153	Tb927.10.15220	hypothetical protein, conserved	22.101	8.8	0	1	0.00569829	0.455948	8.8	1	1	0.86267	-0.0641553		1	8.8	1	1	0.97716	-0.0100343		1	8.8	1	1	1.23391	0.0912845		1
	462	Tb927.4.3160	dihydroxyacetone phosphate acyltransferase, putative (DAT)	137.14	5.3	0	1	-0.00531526	0.456065	4.6	5	5	0.8445	-0.0734003	3.7965	5	2.3	4	4	0.9646	-0.0156527	48.258	5	2.9	4	4	1.18333	0.0731073	8.1425	4
	67	Tb927.10.5620;Tb11.v5.0531	fructose-bisphosphate aldolase, glycosomal (ALD)	41.071	36.3	0	2	-0.00894822	0.456139	21.2	6	6	0.75665	-0.121105	4.7001	4	33.1	9	9	0.93181	-0.0306726	10.704	7	23.1	6	6	1.33332	0.124933	6.037	6
	261	Tb927.11.13050;Tb927.11.13040;Tb927.11.13030;Tb927.11.13020	calmodulin	16.838	16.8	0	4	-0.0138761	0.456507	0	0	0				0	16.8	2	2	0.76772	-0.114797	23.291	2	6	1	1	1.22193	0.087045		1
	662	Tb927.9.11280	unspecified product	35.601	3.9	0	1	-0.0133251	0.456697	0	0	0				0	3.9	1	1	0.77505	-0.11067		1	3.9	1	1	1.21344	0.0840201		1
	550	Tb927.7.210	proline dehydrogenase	63.858	10.4	0	1	-0.00591851	0.456764	10.4	4	4	0.82067	-0.0858314	0.79043	5	10.4	4	4	0.97117	-0.0127047	10.65	4	10.4	4	4	1.20443	0.0807807	5.092	5
	240	Tb927.11.4300;Tb927.10.9880	60S ribosomal protein L18, putative (RPL18)	21.874	26.4	0	2	-0.00854921	0.457404	21.2	3	3	0.77462	-0.110911	6.1326	4	18.7	4	4	0.90813	-0.041852	14.926	5	22.8	4	4	1.34003	0.127116	8.5326	4
	561	Tb927.7.3020;Tb927.7.2980	hypothetical protein, conserved	21.208	17.9	0	2	0.00221836	0.457882	17.4	3	3	0.9228	-0.0348924	7.0867	3	17.4	3	3	1.0494	0.0209411	3.3255	4	7.4	2	2	1.04859	0.0206064	10.402	2
	56	Tb927.5.450;Tb11.v5.0222	NADH-ubiquinone oxidoreductase, mitochondrial, putative (NUBM)	55.32	3.6	0	2	-0.0076206	0.458961	2	1	1	0.79586	-0.0991633		1	1.6	1	1	0.90608	-0.0428335		1	2	1	1	1.31563	0.119135		1
	684	Tb927.9.14430	casein kinase II, putative	41.017	14.9	0	1	0.00715919	0.459007	3.7	1	1	0.79693	-0.0985798		1	6.3	2	2	1.0127	0.00548081	8.9808	2	8.6	2	2	1.3019	0.114577	14.24	2
	152	Tb927.10.1520	ras-related protein Rab21, putative (RAB21)	28.639	9.3	0	1	-0.00637709	0.460175	4.5	1	1	0.76493	-0.116378		1	4.5	1	1	1.0635	0.0267375	4.4435	2	4.8	1	1	1.17628	0.0705095		1
	401	Tb927.2.5160	chaperone protein DNAj, putative	44.327	20.5	0	1	0.00857737	0.461683	15.8	5	5	0.8046	-0.09442	7.8055	10	20.5	6	6	0.90472	-0.0434858	3.8692	9	11.5	3	3	1.4576	0.163638	10.25	4
	160	Tb927.10.190;Tb927.9.15360;REV__Tb927.3.5050	40S ribosomal protein S6, putative	28.44	12	0	3	-0.00534511	0.462268	9.2	2	2	0.8211	-0.0856039	4.4032	2	9.2	2	2	0.96226	-0.0167076	2.9033	2	5.6	2	2	1.21977	0.0862762	3.4797	2
	167	Tb927.10.2560	mitochondrial malate dehydrogenase (mMDH)	33.188	54.7	0	1	0.00463798	0.462576	48.7	9	9	0.85783	-0.0665988	4.0579	9	51.3	10	10	0.9918	-0.0035759	15.876	12	42.8	7	7	1.21364	0.0840886	6.5791	11
	210	Tb927.10.6510;Tb927.10.6400	chaperonin HSP60, mitochondrial precursor (HSP60)	59.503	52	0	2	-0.00664285	0.462653	22.2	9	9	0.80174	-0.0959664	8.4423	10	43.2	16	16	0.91574	-0.0382278	6.4699	18	38.3	14	14	1.30097	0.114266	7.7228	17
	331	Tb927.11.4450	ALBA-Domain Protein (ALBA2)	12.757	36.8	0	1	-0.00569283	0.462802	19.7	2	2	0.83031	-0.0807597	3.2066	2	6.8	1	1	0.92193	-0.0353021		1	17.1	1	1	1.25598	0.0989833		1
	701	Tb927.9.4680	ATP-dependent DEAD box helicase, putative,eukaryotic initiation factor 4a, putative	45.361	21.5	0	1	-0.00781994	0.463322	5.9	1	1	0.83523	-0.0781939		1	21.5	4	4	0.81715	-0.0876982	8.7866	4	9.4	2	2	1.38814	0.142432	7.9082	2
	129	Tb927.10.12840	mitochondrial carrier protein (MCP12)	33.131	6.9	0	1	0.00575653	0.463555	3	1	1	0.86944	-0.0607604	0.78417	2	6.9	2	2	0.91545	-0.0383654	5.7325	2	3.9	1	1	1.30736	0.116395		1
	532	Tb927.6.4960	Zinc finger CCCH domain-containing protein 47 (zc3h47)	29.178	4.2	0	1	0.0173253	0.463801	0	0	0				0	4.2	1	1	0.7339	-0.134363		1	4.2	1	1	1.47575	0.169014		1
	492	Tb927.5.3090	hypothetical protein, conserved	11.655	20.8	0	1	0.00525436	0.464248	9.9	1	1	0.83355	-0.0790683	0.24922	2	20.8	2	2	0.98903	-0.00479053	3.6694	3	20.8	2	2	1.25783	0.0996219	2.6297	3
	256	Tb927.11.11590	eukaryotic translation initiation factor, putative	46.677	12.6	0	1	-0.0068225	0.465449	7.7	2	2	0.74212	-0.129526	4.8378	2	10.4	2	2	0.99411	-0.00256556	5.7648	2	10.4	2	2	1.29308	0.111624	1.5028	2
	455	Tb927.4.2180	60S ribosomal protein L35a, putative	17.021	35.6	0	1	0.00828447	0.465499	27.5	5	5	0.75445	-0.12237	10.706	6	27.5	5	5	0.95554	-0.0197511	3.1239	6	16.1	3	3	1.46884	0.166974	26.327	3
	337	Tb927.11.550	hypothetical protein SCD6.10	31.292	30.4	0	1	-0.00710526	0.465665	26.1	6	6	0.76407	-0.116867	7.0842	6	13.6	3	3	0.92135	-0.0355754	5.3207	4	19.3	4	4	1.35247	0.131126	4.1273	5
	321	Tb927.2.6090;Tb927.11.3230	60S ribosomal protein L44,ribosomal protein L36a.e (RPL44)	12.454	8.5	0	2	-0.00460954	0.46632	8.5	2	2	0.8316	-0.0800855	2.2035	3	8.5	2	2	0.95714	-0.0190245	1.7526	3	8.5	1	1	1.21697	0.0852814	2.0916	2
	500	Tb927.5.680	hypothetical protein, conserved	65.263	5.3	0	1	-0.00438364	0.467336	5.3	2	2	0.80929	-0.0918958	1.8565	2	5.3	2	2	1.0187	0.00804631	5.7539	2	2.7	1	1	1.17679	0.0706986		1
	668	Tb927.9.12240;Tb927.9.12200	unspecified product	21.692	29.8	0	2	-0.00587488	0.468855	15.4	4	4	0.78078	-0.107471	4.667	5	29.8	6	6	0.93417	-0.0295741	5.9992	9	22.9	4	4	1.3165	0.119421	8.2823	6
	542	Tb927.7.1340;Tb927.7.1320	10 kDa heat shock protein, putative (HSP10)	10.67	42	0	2	-0.00510944	0.469878	22	2	2	0.80507	-0.0941664	2.1621	2	42	3	3	0.93351	-0.029881	4.8987	2	14	1	1	1.28446	0.108719		1
	134	Tb927.10.14000	aconitase (ACO)	98.314	3.3	0	1	0.0129928	0.47021	0	0	0				0	1	1	1	0.74915	-0.125431		1	2.3	2	2	1.41715	0.151417		1
	611	Tb927.8.2550	mitochondrial DNA primase (PRI1)	69.862	15.9	0	1	0.00728173	0.470645	11.9	6	6	0.78965	-0.102565	6.3017	6	4.1	3	3	0.87925	-0.0558876	7.7822	3	6.2	4	4	1.5146	0.180298	15.262	3
	63	Tb927.1.2390;Tb927.1.2370;Tb927.1.2350;Tb927.1.2330;Tb11.v5.0469;Tb927.1.2410	beta tubulin	49.704	28.1	0	6	0.00407597	0.471227	18.1	7	7	0.83217	-0.0797879	16.297	7	24.7	8	8	0.99731	-0.00116983	11.747	8	20.8	6	6	1.23933	0.0931857	9.4639	5
	718	Tb927.9.8420;Tb927.9.8070	60S ribosomal protein L10, putative,QM-like protein	24.736	31	0	2	-0.00345461	0.471304	17.4	4	4	0.84298	-0.0741827	9.4324	3	21.6	5	5	0.97972	-0.00889803	1.6943	5	12.7	2	2	1.18227	0.0727169	16.558	3
	621	Tb927.8.4450	RNA-binding protein, putative (RBP11)	47.214	5.6	0	1	-0.00728663	0.472014	5.6	2	2	0.71238	-0.147288	3.6784	2	5.6	2	2	0.91108	-0.0404435	17.044	2	3.5	1	1	1.46512	0.165872		1
	396	Tb927.2.4210	glycosomal phosphoenolpyruvate carboxykinase (PEPCK)	58.564	49.7	0	1	0.00364982	0.472642	26.3	11	11	0.84153	-0.0749304	17.49	13	34.7	14	14	0.99531	-0.00204163	11.473	14	39.8	14	14	1.22439	0.0879215	22.555	15
	373	Tb927.11.880	cyclophilin a,cyclophilin type peptidyl-prolyl cis-trans isomerase (CYPA)	18.717	29.9	0	1	-0.00415318	0.472746	9.6	1	1	0.82488	-0.0836092	3.4018	2	29.9	4	4	0.93917	-0.0272558	4.4659	6	9.6	1	1	1.25431	0.0984055	0.69152	2
	516	Tb927.6.2640	importin alpha subunit, putative (TbKap60)	58.065	3.9	0	1	-0.00923558	0.472906	2.1	1	1	0.71361	-0.146539		1	3.9	2	2	0.77308	-0.111776		1	3.9	2	2	1.70062	0.230608	26.037	2
	386	Tb927.11.9980	2-oxoglutarate dehydrogenase E1 component, putative	112.95	11.6	0	1	0.00400647	0.472961	6.9	6	6	0.81742	-0.0875547	4.2624	4	7.8	7	7	1.0138	0.00595229	13.291	7	10	8	8	1.24057	0.0936219	5.9214	7
	106	Tb927.10.10010	60S acidic ribosomal protein, putative	25.628	4.9	0	1	-0.00788564	0.473303	4.9	1	1	0.70924	-0.149207		1	4.9	1	1	0.85101	-0.0700653		1	4.9	1	1	1.56897	0.195615		1
	449	Tb927.4.1860	ribosomal protein S19, putative	18.846	10.8	0	1	0.00486025	0.474313	5.4	1	1	0.78524	-0.104998		1	10.2	2	2	0.9861	-0.00607904	5.7368	2	5.4	2	2	1.33554	0.125657	2.2781	2
	593	Tb927.7.710	heat shock 70 kDa protein, putative (HSP70)	70.211	20.7	0	1	-0.00572088	0.47474	9.7	5	3	0.73543	-0.133459	19.319	5	14.9	7	7	0.94362	-0.0252029	10.664	7	5.8	3	2	1.38516	0.141499	4.6785	2
	657	Tb927.9.10770	Polyadenylate-binding protein 2 (Poly(A)-binding protein 2) (Poly(A)-binding protein II) (PABII) (Polyadenylate-binding nuclear protein 1) (Nuclear poly(A)-binding protein 1) (PABP2), putative (PABP2)	62.147	21.4	0	1	-0.00403089	0.476065	8.6	5	5	0.81861	-0.086923	6.4217	5	14.2	7	7	0.91947	-0.0364624	3.711	9	11	5	5	1.29209	0.111293	5.3111	5
	536	Tb927.6.5130;Tb927.6.5120	60S acidic ribosomal protein P2, putative	10.444	16.8	0	2	-0.0046405	0.476165	9.3	1	1	0.77539	-0.11048		1	16.8	2	2	0.93809	-0.0277555	5.3822	2	7.5	1	1	1.33142	0.124314		1
	131	Tb927.10.13430	citrate synthase, putative	53.584	2.1	0	1	-0.00326388	0.476305	0	0	0				0	2.1	1	1	0.89737	-0.0470285		1	2.1	1	1	1.09774	0.0405007		1
	206	Tb927.10.5910	hypothetical protein, conserved	85.801	0.9	0.0057471	1	-0.00482563	0.47732	0.9	1	1	0.77016	-0.113419		1	0.9	1	1	0.91094	-0.0405102		1	0.9	1	1	1.37864	0.139452		1
	347	Tb927.11.6300	40S ribosomal protein S5, putative	21.386	23.7	0	1	-0.00285024	0.477756	23.2	3	3	0.82955	-0.0811574	3.7535	4	23.2	3	3	0.99308	-0.00301576	2.6731	4	23.7	4	4	1.19021	0.0756225	2.5705	6
	229	Tb927.10.8290;Tb927.10.8270;Tb11.v5.0877	eukaryotic translation initiation factor 3 subunit 8, putative	84.339	4.1	0	3	-0.00442882	0.478036	1.4	1	1	0.80651	-0.0933902	4.2639	2	2.3	2	2	0.87844	-0.0562879	11.235	3	2.7	2	2	1.36896	0.136392	11.088	2
	728	Tb927.9.9450	zinc finger protein family member, putative (ZC3H28)	114.75	6.2	0	1	0.0063353	0.47846	3.8	3	3	0.79389	-0.10024	4.3977	4	3.5	3	3	0.80382	-0.0948412	9.8996	4	1.4	1	1	1.63714	0.214087		1
	460	Tb927.4.3070	hypothetical protein, conserved	51.431	6.5	0	1	0.00309772	0.480282	4.7	1	1	0.80983	-0.0916061		1	4.7	1	1	1.0007	0.0003039		1	6.5	2	2	1.26065	0.100595	32.026	2
	477	Tb927.5.1090	threonyl-tRNA synthetase, putative	90.983	5.1	0	1	0.0029616	0.48094	2.9	2	2	0.81377	-0.0894983	12.447	3	5.1	4	4	0.99522	-0.0020809	3.6591	5	1.3	1	1	1.26027	0.100464	9.7879	2
	138	Tb927.10.14550	ATP-dependent DEAD/H RNA helicase, putative	71.366	10.9	0	1	0.00216348	0.481895	6.4	4	3	0.86633	-0.0623166	73.388	6	9.7	5	4	0.97092	-0.0128166	21.236	3	9.5	5	5	1.20677	0.0816236	9.5249	5
	145	Tb927.10.14860	hypothetical protein, conserved	83.434	8	0	1	-0.0032397	0.482556	3.9	3	3	0.8184	-0.0870344	4.7581	3	2.8	2	2	0.89368	-0.048818	1.3504	2	4.3	2	2	1.33701	0.126133	14.437	2
	363	Tb927.11.740	eukaryotic translation initiation factor 5A, putative (eIF-5A)	17.82	30.7	0	1	0.00420993	0.484048	15.7	1	1	0.7115	-0.147825		1	30.7	3	3	0.96972	-0.0133536	18.595	3	15.7	1	1	1.49214	0.173809	3.0913	2
	204	Tb927.10.5810	hypothetical protein, conserved	48.257	12.9	0	1	-0.00274495	0.484223	10.6	2	2	0.8044	-0.0945279	0.45277	2	12.9	3	3	0.93817	-0.0277185	2.6806	3	10.6	2	2	1.3002	0.114012	1.8474	2
	201	Tb927.10.5670	N-acetyltransferase subunit Nat1, putative (NAT1)	82.189	5.5	0	1	-0.00149968	0.484267	2.7	2	2	0.95539	-0.0198193	31.885	2	5.5	3	3	0.89437	-0.0484828	24.153	3	2.8	1	1	1.15825	0.063803		1
	691	Tb927.9.2070	hypothetical protein, conserved	82.112	4.8	0	1	-0.00565741	0.484332	3.3	2	2	0.7577	-0.120503	14.229	2	0	0	0				0	1.5	1	1	1.28584	0.109188		1
	416	Tb927.3.1920	NOT5 protein (NOT5)	66.856	4.6	0	1	-0.00709135	0.484501	2.8	1	1	0.7037	-0.152612		1	0	0	0				0	1.8	1	1	1.3754	0.13843		1
	277	Tb927.11.14730	metalloprotease, putative,cell division protein FtsH homologue, putative	74.475	2.7	0.0098453	1	0.00363554	0.485521	0	0	0				0	2.7	1	1	0.83901	-0.0762329		1	2.7	1	1	1.212	0.0835039		1
	148	Tb927.10.1510	NOT1 (NOT1)	259.12	3.9	0	1	0.0023885	0.486564	2	3	3	0.80535	-0.0940153	8.1456	4	2	3	3	0.95675	-0.0192015	8.6277	4	3.9	7	7	1.31942	0.120382	12.73	7
	276	Tb927.11.1450	2-oxoglutarate dehydrogenase E1 component, putative	113.38	11.8	0	1	0.00217175	0.487247	6.2	4	4	0.81432	-0.0892049	6.3747	5	7.7	5	5	0.95498	-0.0200057	6.938	5	10.4	6	6	1.30535	0.115726	8.8884	8
	664	Tb927.9.11490;Tb927.9.11470	60S ribosomal protein L27a,60S ribosomal protein L28,60S ribosomal protein L29 (RPL27A)	16.266	25.5	0	2	0.00256411	0.487524	12.4	2	2	0.78205	-0.106765	3.7554	2	19.3	3	3	0.94268	-0.0256357	6.0828	3	13.1	2	2	1.38068	0.140094	2.2519	2
	603	Tb927.8.1340;Tb927.8.1330	60S ribosomal protein L7a, putative	30.879	19.9	0	2	-0.00196123	0.487829	8	1	1	0.83271	-0.0795062		1	19.9	3	3	0.92162	-0.0354481		1	14.9	2	2	1.2855	0.109071		1
	721	Tb927.9.8450	adenylate kinase (ADKG)	22.44	22.5	0	1	-0.00206293	0.487916	22.5	4	4	0.80714	-0.0930511	6.1045	4	22.5	5	5	0.94359	-0.0252167	5.1056	6	13.5	3	3	1.29443	0.112079	3.5896	3
	71	Tb927.7.2570;Tb11.v5.0611	guide RNA associated protein, GAP2,mitochondrial RNA binding protein 1	52.545	7.8	0	2	0.00197217	0.488069	4.9	1	1	0.81203	-0.0904279		1	7.8	2	2	0.9688	-0.0137659	10.497	2	7.8	2	2	1.28858	0.11011	8.6253	2
	381	Tb927.11.9640	glycyl-tRNA synthetase, putative	70.175	2.2	0	1	0.00286353	0.488659	0	0	0				0	2.1	1	1	0.83661	-0.0774769		1	2.2	1	1	1.21117	0.083204		1
	122	Tb927.10.12030	hypothetical protein, conserved	27.19	9.6	0	1	-0.00234355	0.48889	5.6	1	1	0.72978	-0.136808		1	5.6	1	1	1.0211	0.00906828	9.5975	2	9.6	3	3	1.32041	0.120709	5.9498	4
	57	Tb927.10.5340;Tb927.10.5330;Tb11.v5.1060;Tb11.v5.0243	40S ribosomal protein S18, putative (RPS18)	17.51	43.8	0	4	0.00132519	0.490029	29.4	5	5	0.83267	-0.0795271	7.5866	5	34.6	7	7	1.0007	0.0003039	5.6102	12	42.5	7	7	1.21115	0.0831988	3.8629	12
	436	Tb927.3.4990	oxidoreductase, putative	36.432	41.9	0	1	-0.00147317	0.490177	38.3	8	8	0.82481	-0.0836461	7.0647	8	41.6	10	10	0.95848	-0.0184169	6.5804	9	24.2	4	4	1.25211	0.0976435	14.576	6
	547	Tb927.7.1730;Tb927.7.1750;Tb927.7.1740	60S ribosomal protein L7, putative	27.713	19	0	3	-0.00169992	0.490344	3.3	1	1	0.80514	-0.0941286		1	19	6	6	0.93828	-0.0276675	16.743	8	15.7	4	4	1.30827	0.116696	4.6986	4
	559	Tb927.7.2700	NADH-cytochrome b5 reductase, putative (B5R)	31.856	68.3	0	1	-0.00123868	0.490539	51.9	12	12	0.84556	-0.0728556	17.045	18	63.4	14	14	0.96335	-0.0162159	7.1274	21	51.6	12	12	1.21718	0.0853554	15.365	16
	214	Tb927.10.6810	guanylate kinase, putative	29.956	10.6	0	1	-0.00160818	0.491093	6.8	1	1	0.83378	-0.0789485		1	6.8	1	1	0.88945	-0.0508785		1	10.6	2	2	1.33353	0.125002	10.06	2
	380	Tb927.11.9590	S-adenosylhomocysteine hydrolase, putative	48.447	19.7	0	1	-0.00128424	0.49172	4.1	2	2	0.83014	-0.0808487	8.2097	2	14.4	6	6	0.94003	-0.0268583	4.6585	6	10.1	5	5	1.27015	0.103854	13.272	5
	177	Tb927.10.3260	Long-chain-fatty-acid--CoA ligase 5 (EC 6.2.1.3) (Long-chain acyl-CoA synthetase 5) (LACS 5), putative	78.983	4.1	0	1	-0.000616721	0.491749	1.6	1	1				0	3	2	2	1.0548	0.0231701		1	1.1	1	1	0.945358	-0.0244036		1
	351	Tb927.11.6510;Tb927.11.6500	40S ribosomal protein S21, putative	21.118	7.7	0	2	-0.00167626	0.492247	7.7	1	1	0.78505	-0.105103	4.0071	2	7.7	1	1	0.89652	-0.04744		1	7.7	1	1	1.40447	0.147514		1
	676	Tb927.9.13460	hypothetical protein, conserved	16.425	14.5	0	1	0.000477144	0.492331	14.5	1	1	0.95648	-0.0193241		1	14.5	1	1	1.0478	0.0202784		1	0	0	0				0
	414	Tb927.3.1820	mitochondrial RNA binding complex 1 subunit (MRB1820)	25.432	31.4	0	1	-0.00148024	0.492984	31.4	6	6	0.75586	-0.121559	5.9315	5	11	2	2	0.95921	-0.0180863	1.4771	2	21.6	4	4	1.36522	0.135204	16.74	5
	409	Tb927.3.1380	ATP synthase beta chain, mitochondrial precursor,ATP synthase F1, beta subunit	55.775	16.2	0	1	-0.000932305	0.493108	8.3	3	3	0.83786	-0.0768285	13.696	3	16	5	5	0.96965	-0.013385	5.2845	5	9.8	4	4	1.22297	0.0874166	8.59	4
	289	Tb927.11.16130	nucleoside diphosphate kinase (NDPK)	16.857	40.5	0	1	0.00148316	0.49335	21.6	3	3	0.77025	-0.113368	3.1178	4	32.7	4	4	0.92327	-0.0346713	5.7379	5	40.5	5	5	1.42066	0.152489	20.953	3
	154	Tb927.10.15410	glycosomal malate dehydrogenase (gMDH)	33.71	6.5	0	1	-0.00161101	0.494259	3.1	1	1	0.81111	-0.0909202		1	3.4	1	1				0	3.1	1	1	1.22377	0.0876982		1
	139	Tb927.11.4820;Tb927.10.14580	60S ribosomal protein L17, putative	19.105	12	0	2	0.000976109	0.494471	5.4	1	1	0.80083	-0.0964597		1	12	2	2	0.95966	-0.0178826	3.5874	3	12	2	2	1.31	0.117271	12.448	2
	257	Tb927.11.11680	2-oxoglutarate dehydrogenase E2 component, putative	41.143	18.3	0	1	-0.000531214	0.49665	10.2	4	4	0.82199	-0.0851335	6.1922	3	13.3	5	5	0.95075	-0.0219337	4.8256	6	13.1	4	4	1.27489	0.105473	16.735	4
	461	Tb927.4.3150	hypothetical protein, conserved	38.204	9	0	1	0.00163757	0.496755	6.1	2	2	0.69347	-0.158972	4.4111	2	0	0	0				0	2.9	1	1	1.45294	0.162247	8.1554	2
	682	Tb927.9.13920;Tb927.9.13880;Tb927.9.13820	kinetoplastid membrane protein KMP-11 (KMP-11)	11.076	66.3	0	3	0.000485429	0.496792	35.9	4	4	0.80496	-0.0942257	7.8134	4	41.3	4	4	1.0109	0.0047082	5.9529	5	50	5	5	1.23303	0.0909738	5.2439	6
	340	Tb927.11.5840	Protein translation factor SUI1 homolog, putative	12.738	9.2	0	1	-0.000493253	0.497175	9.2	1	1	0.81503	-0.0888264		1	9.2	1	1	0.93107	-0.0310177		1	9.2	1	1	1.3133	0.118364		1
	632	Tb927.8.6030;Tb927.9.14000	60S ribosomal protein L12, putative	17.564	30.5	0	2	0.000468361	0.497178	30.5	3	3	0.82551	-0.0832777	6.7688	7	30.5	3	3	0.93567	-0.0288773	6.0537	3	21.3	2	2	1.29885	0.11356	2.585	2
	164	Tb927.10.2290	chaperone protein DNAj, putative	46.795	16.1	0	1	0.000476887	0.497964	9.9	2	2	0.72232	-0.14127	1.0567	2	16.1	4	4	0.99341	-0.00287147	1.6139	4	9.9	2	2	1.39821	0.145572	4.2764	2
	551	Tb927.7.2160	hypothetical protein, conserved	37.233	7.6	0	1	0.000643	0.498607	4.4	1	1	0.59055	-0.228743		1	7.6	2	2	0.82057	-0.0858844	11.218	2	4.4	1	1	2.0728	0.316557		1
	239	Tb927.11.10160;Tb927.10.9800	60S ribosomal protein L22, putative	15.259	22.3	0	2	0.000280129	0.498659	22.3	1	1	0.73737	-0.132315		1	22.3	1	1	1.0238	0.0102151		1	22.3	1	1	1.32721	0.12294		1
	37	Tb11.v5.0537;Tb927.11.9920;Tb11.01.1680.v5	polyubiquitin, putative	70.128	40.8	0	3	0.00034024	0.498697	40.8	3	3	0.80804	-0.0925671	7.9007	4	40.8	3	3	0.81034	-0.0913327	23.699	4	40.8	3	3	1.53081	0.184921	4.1019	4
	732	Tb927.9.9730	hypothetical protein, conserved	44.559	1.8	0.0045455	1	-1.693		0	0	0				0	1.8	1	1	0.020277	-1.693		1	0	0	0				0
	49	Tb927.7.4600;Tb11.v5.0147	hypothetical protein, conserved	108.78	1.4	0.0045732	2	-1.68085		0	0	0				0	1.4	1	1	0.020852	-1.68085		1	0	0	0				0
	688	Tb927.9.16160	variant surface glycoprotein (VSG, pseudogene), putative,variant surface glycoprotein (VSG), degenerate	38.864	3.7	0.0031447	1	-1.68085		0	0	0				0	3.7	1	1	0.020852	-1.68085		1	0	0	0				0
	74	Tb927.10.8230;Tb11.v5.0668	protein disulfide isomerase,bloodstream- specific protein 2 precursor	55.579	2.4	0	2	-0.353214		0	0	0				0	2.4	1	1	0.44339	-0.353214		1	0	0	0				0
	456	Tb927.4.2310	asparaginyl-tRNA synthetase, putative	75.462	2.5	0	1	-0.339865		0	0	0				0	2.5	2	2	0.45723	-0.339865	27.668	2	0	0	0				0
	45	Tb927.10.15250;Tb11.v5.0996;Tb11.1220	paraflagellar rod component, putative (PFC15)	57.813	2.1	0	3	-0.311109		2.1	1	1	0.48853	-0.311109		1	0	0	0				0	0	0	0				0
	687	Tb927.9.15420	unspecified product	15.353	28.8	0.0098039	1	-0.279601		19.7	2	0				0	28.8	3	1	0.52529	-0.279601		1	13.6	1	0				0
	150	Tb927.10.15170	hypothetical protein, conserved	77.347	1.9	0.0031596	1	-0.265848		1.9	1	1	0.54219	-0.265848		1	0	0	0				0	0	0	0				0
	284	Tb927.11.15420	hypothetical protein, conserved	23.057	5.4	0.0045524	1	-0.211917		0	0	0				0	5.4	1	1	0.61388	-0.211917		1	0	0	0				0
	35	Tb927.10.4440;Tb10.v4.0034	predicted SAP domain protein	30.902	5.2	0	2	-0.184256		5.2	1	1	0.65425	-0.184256		1	0	0	0				0	0	0	0				0
	34	Tb08.27P2.220	variant surface glycoprotein (VSG, atypical), putative,BAC from homologous region on chr8	54.021	2	0.0045872	1	-0.169078		2	1	1	0.67752	-0.169078		1	0	0	0				0	0	0	0				0
	446	Tb927.4.1330	DNA topoisomerase IB, large subunit	79.257	1.7	0	1	-0.16238		1.7	1	1	0.68805	-0.16238		1	0	0	0				0	0	0	0				0
	69	Tb11.v5.0600;Tb927.11.7450	hypothetical protein, conserved	53.51	3	0	2	-0.161189		3	1	1	0.68994	-0.161189		1	0	0	0				0	0	0	0				0
	242	Tb927.11.10070	hypothetical protein, conserved	25.415	12.7	0	1	-0.151361		0	0	0				0	12.7	1	1	0.70573	-0.151361		1	0	0	0				0
	378	Tb927.11.9280	hypothetical protein, conserved	74.128	3.1	0	1	-0.149801		3.1	1	1	0.70827	-0.149801		1	0	0	0				0	0	0	0				0
	375	Tb927.11.900;Tb927.8.3690	isocitrate dehydrogenase, putative (IDH)	46.77	2.4	0.0031008	2	-0.14604		0	0	0				0	2.4	1	1	0.71443	-0.14604		1	0	0	0				0
	599	Tb927.7.900	hypothetical protein, conserved	64.798	2.9	0	1	-0.133795		0	0	0				0	2.9	1	1	0.73486	-0.133795		1	0	0	0				0
	179	Tb927.10.3560	arginine N-methyltransferase, putative	42.121	2.8	0	1	-0.129163		0	0	0				0	2.8	1	1	0.74274	-0.129163		1	0	0	0				0
	650	Tb927.9.10100	hypothetical protein, conserved	160.65	1.4	0	1	-0.127966		0	0	0				0	1.4	2	2	0.74479	-0.127966	25.577	2	0	0	0				0
	146	Tb927.10.14930	Zinc finger CCCH domain-containing protein 39 (ZC3H39)	31.519	3.2	0.0097629	1	-0.126522		0	0	0				0	3.2	1	1	0.74727	-0.126522		1	0	0	0				0
	702	Tb927.9.5210	glutaminyl-tRNA synthetase, putative	67.278	1.6	0	1	-0.124817		0	0	0				0	1.6	1	1	0.75021	-0.124817		1	0	0	0				0
	474	Tb927.4.770	ubiquitin-protein ligase, putative (upl3)	142.06	1.9	0	1	-0.124684		1.9	1	1	0.75044	-0.124684		1	0	0	0				0	0	0	0				0
	557	Tb927.7.2390	hypothetical protein, conserved	102.86	1.7	0	1	-0.12425		1.7	1	1	0.75119	-0.12425		1	0	0	0				0	0	0	0				0
	372	Tb927.11.8700	hypothetical protein, conserved	65.26	2.6	0	1	-0.120916		2.6	1	1	0.75698	-0.120916		1	0	0	0				0	0	0	0				0
	681	Tb927.9.1380	hypothetical protein, conserved	42.439	2.4	0.0016	1	-0.118741		2.4	1	1	0.76078	-0.118741		1	0	0	0				0	0	0	0				0
	615	Tb927.8.3380	electron transfer protein, putative	27.259	11.6	0	1	-0.115256		0	0	0				0	11.6	1	1	0.76691	-0.115256		1	0	0	0				0
	379	Tb927.11.9530	14-3-3-I protein	30.31	3.8	0	1	-0.108529		0	0	0				0	3.8	1	1	0.77888	-0.108529		1	0	0	0				0
	713	Tb927.9.7520	hypothetical protein, conserved	38.016	3.2	0.0016129	1	-0.108435		0	0	0				0	3.2	1	1	0.77905	-0.108435		1	0	0	0				0
	613	Tb927.8.2770	inositol 1,4,5-trisphosphate receptor (IP3R)	342.48	0.5	0	1	-0.107232		0	0	0				0	0.5	1	1	0.78121	-0.107232		1	0	0	0				0
	190	Tb927.10.450	hypothetical protein, conserved	65.63	2.1	0	1	-0.0999116		0	0	0				0	2.1	1	1	0.79449	-0.0999116		1	0	0	0				0
	703	Tb927.9.5320	nucleolar RNA binding protein, putative	46.864	2.3	0.0084626	1	-0.0980788		0	0	0				0	2.3	1	1	0.79785	-0.0980788		1	0	0	0				0
	680	Tb927.9.13610	helicase, putative	149.24	0.8	0	1	-0.0973989		0.8	1	1	0.7991	-0.0973989		1	0	0	0				0	0	0	0				0
	426	Tb927.3.3460	hypothetical protein, conserved	53.228	5	0	1	-0.0944362		0	0	0				0	5	1	1	0.80457	-0.0944362		1	0	0	0				0
	248	Tb927.11.10820	protein kinase ck2 regulatory subunit, putative,casein kinase II beta chain, putative	33.52	5.4	0	1	-0.0933849		0	0	0				0	5.4	2	2	0.80652	-0.0933849	13.359	2	0	0	0				0
	266	Tb927.11.13600	hypothetical protein, conserved	40.402	4.5	0	1	-0.091097		4.5	1	1	0.81078	-0.091097		1	0	0	0				0	0	0	0				0
	269	Tb927.11.13810	ATP-dependent DEAD/H RNA helicase, putative,ATP- dependent RNA helicase, putative	62.912	2.9	0	1	-0.0899522		2.9	1	1	0.81292	-0.0899522		1	0	0	0				0	0	0	0				0
	457	Tb927.4.2740	hypothetical protein, conserved	16.327	6	0.0031348	1	-0.0877035		0	0	0				0	6	1	1	0.81714	-0.0877035		1	0	0	0				0
	51	Tb927.7.4970;Tb11.v5.0178	glutamine synthetase, putative (GS)	42.433	7.1	0	2	-0.0860802		0	0	0				0	7.1	1	1	0.8202	-0.0860802		1	0	0	0				0
	348	Tb927.11.6320	MRB1-associated protein,zinc finger ccch and cchc domain-containing protein	53.267	3.4	0	1	-0.0860749		0	0	0				0	3.4	1	1	0.82021	-0.0860749		1	0	0	0				0
	191	Tb927.10.4550	hypothetical protein, conserved	18.658	6.4	0	1	-0.0858791		0	0	0				0	6.4	1	1	0.82058	-0.0858791		1	0	0	0				0
	609	Tb927.8.2790;Tb927.8.2520	acetyl-CoA synthetase (pseudogene), putative,acetyl-CoA synthetase, truncated	11.591	8.5	0.0058309	2	-0.0857574		0	0	0				0	8.5	1	1	0.82081	-0.0857574		1	0	0	0				0
	434	Tb927.3.4920	LETM1 and EF-hand domain-containing protein 1, putative	42.737	3.4	0	1	-0.084843		3.4	1	1	0.82254	-0.084843		1	0	0	0				0	0	0	0				0
	539	Tb927.6.950	cysteinyl-tRNA synthetase, putative	89.376	1.4	0	1	-0.0846107		0	0	0				0	1.4	1	1	0.82298	-0.0846107		1	0	0	0				0
	625	Tb927.8.4820;Tb11.v5.0659	eukaryotic translation initation factor 4 gamma, putative (eIF4G3)	69.338	4.2	0	2	-0.0840412		0	0	0				0	4.2	2	2	0.82406	-0.0840412		1	0	0	0				0
	521	Tb927.6.3290	intraflagellar transport protein 20, putative (IFT20)	15.419	7.7	0.0057225	1	-0.0810952		0	0	0				0	0	0	0				0	7.7	1	1	0.829669	-0.0810952		1
	689	Tb927.9.16680	variant surface glycoprotein (VSG, pseudogene), putative,variant surface glycoprotein (VSG), degenerate and frameshifted fragment	50.637	1.5	0.004491	1	-0.079209		0	0	0				0	1.5	1	1	0.83328	-0.079209		1	0	0	0				0
	698	Tb927.9.4190	fatty acyl CoA syntetase 1 (ACS1)	78.959	1.6	0	1	-0.0781523		0	0	0				0	1.6	1	1	0.83531	-0.0781523		1	0	0	0				0
	274	Tb927.11.14200	ubiquitin-conjugating enzyme E2, putative,ubiquitin carrier protein, putative,ubiquitin-protein ligase, putative	28.163	4	0	1	-0.0781315		0	0	0				0	4	1	1	0.83535	-0.0781315		1	0	0	0				0
	91	Tb927.1.190;Tb927.2.510	retrotransposon hot spot protein (RHS, pseudogene), putative	94.659	3.6	0.0058224	2	-0.077425		1.4	1	0				0	2.5	2	1	0.83671	-0.077425		1	2.5	2	0				0
	570	Tb927.7.3750	TFIIF-stimulated CTD phosphatase, putative	22.571	5.1	0.0058824	1	-0.0766368		0	0	0				0	5.1	1	1	0.83823	-0.0766368		1	0	0	0				0
	672	Tb927.9.12650	ubiquitin-activating enzyme E1, putative (UBA2)	134.65	1.2	0	1	-0.0745848		0	0	0				0	1.2	1	1	0.8422	-0.0745848		1	0	0	0				0
	359	Tb927.11.7080;Tb927.11.7060	acidocalcisomal pyrophosphatase	47.296	2.4	0.0084746	2	-0.0709951		2.4	1	1	0.84919	-0.0709951		1	0	0	0				0	0	0	0				0
	283	Tb927.11.15370	hypothetical protein, conserved (TbKap123)	117.88	1.5	0	1	-0.0700909		0	0	0				0	1.5	1	1	0.85096	-0.0700909		1	0	0	0				0
	251	Tb927.11.11250	cytosolic malate dehydrogenase (cMDH)	35.151	3.4	0.0057803	1	-0.0683032		0	0	0				0	3.4	1	1	0.85447	-0.0683032		1	0	0	0				0
	598	Tb927.7.840	hypothetical protein, conserved	14.51	8.1	0	1	-0.0673436		0	0	0				0	8.1	1	1	0.85636	-0.0673436		1	0	0	0				0
	92	Tb927.1.2100	cysteine peptidase, Clan CA, family C2, putative,calpain-like cysteine peptidase, putative	126.15	10.4	0	1	-0.0638181		0	0	0				0	10.4	1	1	0.86334	-0.0638181		1	0	0	0				0
	50	Tb927.7.4770;Tb11.v5.0160	cyclophilin-type peptidyl-prolyl cis-trans isomerase, putative (PPIase)	18.59	6.9	0	2	-0.0588166		0	0	0				0	6.9	1	1	0.87334	-0.0588166	8.4856	2	0	0	0				0
	142	Tb927.10.14790	metallo-peptidase, Clan MG, Family M24,aminopeptidase, putative	42.69	5.5	0	1	-0.0575851		0	0	0				0	5.5	1	1	0.87582	-0.0575851		1	0	0	0				0
	302	Tb927.11.1740	intraflagellar transport protein IFT88 (IFT88)	89.754	2.5	0	1	-0.0575455		0	0	0				0	2.5	2	2	0.8759	-0.0575455	4.4888	2	0	0	0				0
	463	Tb927.4.3430	hypothetical protein, conserved	12.369	8.3	0	1	-0.0554877		0	0	0				0	8.3	1	1	0.88006	-0.0554877		1	0	0	0				0
	531	Tb927.6.4930	thiosulfate sulfurtransferase, mitochondrial, putative	30.051	8.5	0	1	-0.0552312		0	0	0				0	8.5	1	1	0.88058	-0.0552312		1	0	0	0				0
	478	Tb927.5.1140	choline/ethanolamine kinase (C/EK1)	73.294	2	0	1	-0.0547284		0	0	0				0	2	1	1	0.8816	-0.0547284		1	0	0	0				0
	313	Tb927.11.2470	aminopeptidase, putative,metallo-peptidase, Clan MF, Family M17	60.585	3.9	0	1	-0.0531843		0	0	0				0	3.9	2	2	0.88474	-0.0531843	0.10675	2	0	0	0				0
	435	Tb927.3.4970	hypothetical protein, conserved	115.81	1	0	1	-0.0518219		1	1	1	0.88752	-0.0518219		1	0	0	0				0	0	0	0				0
	234	Tb927.10.880	thymidine kinase, putative	50.844	2.6	0.0058997	1	-0.0482475		0	0	0				0	0	0	0				0	2.6	1	1	0.894855	-0.0482475		1
	541	Tb927.7.1300	protein disulfide isomerase, putative	41.939	2.7	0.0031847	1	-0.0428335		0	0	0				0	2.7	1	1	0.90608	-0.0428335		1	0	0	0				0
	511	Tb927.6.1900	Essential nuclear protein 1, putative (enp1)	52.9	2.1	0.0045113	1	-0.0411114		0	0	0				0	2.1	1	1	0.90968	-0.0411114		1	0	0	0				0
	107	Tb927.10.10030	hypothetical protein, conserved	11.38	12	0	1	-0.0402957		0	0	0				0	12	1	1	0.91139	-0.0402957		1	0	0	0				0
	441	Tb927.3.780	proteasome alpha 7 subunit (TbPSA7)	25.463	5.9	0	1	-0.0369398		0	0	0				0	5.9	1	1	0.91846	-0.0369398		1	0	0	0				0
	217	Tb927.10.7340;Tb927.10.7330	40S ribosomal protein S24E, putative	15.683	5.1	0.0057887	2	-0.0357404		0	0	0				0	5.1	1	1	0.921	-0.0357404		1	0	0	0				0
	40	Tb11.02.5400b;Tb11.02.5400	cystathionine beta-synthase, putative	39.464	2.8	0.0044776	2	-0.035043		0	0	0				0	2.8	1	1	0.92248	-0.035043		1	0	0	0				0
	517	Tb927.6.2740	pyridoxal kinase (pdxK)	33.332	3	0	1	-0.034996		0	0	0				0	3	1	1	0.92258	-0.034996		1	0	0	0				0
	622	Tb927.8.4540	PAB1-binding protein , putative (PBP1)	59.599	5.3	0	1	-0.0348924		0	0	0				0	5.3	2	2	0.9228	-0.0348924	1.6347	2	0	0	0				0
	297	Tb927.11.16710	hypothetical protein, conserved	13.612	10.2	0	1	-0.0324239		0	0	0				0	10.2	1	1	0.92806	-0.0324239		1	0	0	0				0
	419	Tb927.3.2100	hypothetical protein, conserved	33.996	3.2	0.0057307	1	-0.0314984		0	0	0				0	3.2	1	1	0.93004	-0.0314984		1	0	0	0				0
	473	Tb927.8.7410;Tb927.4.5010	calreticulin, putative	45.021	4.8	0	2	-0.031321		0	0	0				0	4.8	2	2	0.93042	-0.031321	11.051	2	0	0	0				0
	641	Tb927.8.7100	acetyl-CoA carboxylase	242.91	0.6	0	1	-0.031041		0	0	0				0	0.6	1	1	0.93102	-0.031041		1	0	0	0				0
	579	Tb927.7.5230	lanosterol synthase	103.03	1.4	0.0031696	1	-0.0309197		0	0	0				0	1.4	1	1	0.93128	-0.0309197		1	0	0	0				0
	562	Tb927.7.3040	hypothetical protein, conserved	69.073	1.7	0	1	-0.0296903		0	0	0				0	1.7	1	1	0.93392	-0.0296903		1	0	0	0				0
	638	Tb927.8.6580	succinate dehydrogenase flavoprotein, putative	66.88	4.1	0	1	-0.0294904		0	0	0				0	4.1	2	2	0.93435	-0.0294904	11.6	2	0	0	0				0
	58	Tb927.10.5300;Tb11.v5.0246	eukaryotic translation initiation factor 6 (eIF-6), putative	26.925	9.7	0	2	-0.0274312		0	0	0				0	0	0	0				0	9.7	1	1	0.938791	-0.0274312		1
	495	Tb927.5.3540	hypothetical protein, conserved	111.91	0.8	0.0045942	1	-0.0265535		0	0	0				0	0.8	1	1	0.94069	-0.0265535		1	0	0	0				0
	693	Tb927.9.2320	hypothetical protein, conserved	41.498	3	0	1	-0.0253271		0	0	0				0	3	1	1	0.94335	-0.0253271		1	0	0	0				0
	717	Tb927.9.7980	hypothetical protein, conserved	15.754	8.8	0	1	-0.0237968		0	0	0				0	8.8	1	1	0.94668	-0.0237968		1	0	0	0				0
	502	Tb927.5.840	hypothetical protein, conserved	111.5	1.5	0	1	-0.0231275		1.5	1	1	0.94814	-0.0231275		1	0	0	0				0	0	0	0				0
	607	Tb927.8.1990	peroxidoxin,tryparedoxin peroxidase (TRYP2)	25.631	4	0	1	-0.0213129		0	0	0				0	4	1	1	0.95211	-0.0213129		1	0	0	0				0
	568	Tb927.7.3510	hypothetical protein, conserved	56.445	2.3	0.0044577	1	-0.0196421		2.3	1	1	0.95578	-0.0196421		1	0	0	0				0	0	0	0				0
	422	Tb927.3.2900	eukaryotic initiation factor 2a, putative	46.824	6	0	1	-0.018503		6	1	1	0.95829	-0.018503		1	0	0	0				0	0	0	0				0
	236	Tb927.10.9250	G-actin binding protein, putative,CAP/Srv2p, putative	29.333	5.6	0	1	-0.0169916		0	0	0				0	0	0	0				0	5.6	1	1	0.961631	-0.0169916		1
	499	Tb927.5.520	stomatin-like protein, putative	55.979	1.9	0.005891	1	-0.0164188		0	0	0				0	1.9	1	1	0.9629	-0.0164188		1	0	0	0				0
	665	Tb927.9.11600;Tb927.9.11580	unspecified product (gim5B)	25.975	7.1	0	2	-0.0142685		0	0	0				0	0	0	0				0	7.1	1	1	0.96768	-0.0142685		1
	350	Tb927.11.6440	hypothetical protein, conserved	48.841	7	0	1	-0.0137435		0	0	0				0	7	3	3	0.96885	-0.0137435	6.3488	3	0	0	0				0
	224	Tb927.10.7930	2,3-bisphosphoglycerate-independent phosphoglycerate mutase (PGAM)	60.603	1.5	0.0071327	1	-0.0128926		0	0	0				0	1.5	1	1	0.97075	-0.0128926		1	0	0	0				0
	61	Tb927.10.540;Tb11.v5.0414	ATP-dependent DEAD/H RNA helicase, putative,DEAD box RNA helicase, putative	49.226	2.1	0	2	-0.0114187		0	0	0				0	2.1	2	2	0.97405	-0.0114187	12.188	2	0	0	0				0
	584	Tb927.7.5820	Monooxygenase, putative	55.086	2.7	0.0031104	1	-0.00929717		2.7	1	1	0.97882	-0.00929717		1	0	0	0				0	0	0	0				0
	43	Tb927.11.18680;Tb11.0845	dynein light chain LC8, putative (DYNLL1)	10.429	24.4	0	2	-0.0079814		0	0	0				0	24.4	1	1	0.98179	-0.0079814		1	0	0	0				0
	96	Tb927.1.2990	hypothetical protein, conserved	115.95	1	0.0046296	1	-0.00662109		0	0	0				0	1	1	1	0.98487	-0.00662109		1	0	0	0				0
	588	Tb927.7.6200	chaperone protein DNAj, putative	31.594	3.9	0	1	-0.00578846		0	0	0				0	3.9	1	1	0.98676	-0.00578846		1	0	0	0				0
	466	Tb927.4.3790	ubiquitin carboxyl-terminal hydrolase, putative,cysteine peptidase, Clan CA, family C19, putative	52.002	3	0	1	-0.00453592		0	0	0				0	3	1	1	0.98961	-0.00453592		1	0	0	0				0
	660	Tb927.9.11120	hypothetical protein, conserved	72.949	1.8	0.0044843	1	-0.00306825		0	0	0				0	1.8	1	1	0.99296	-0.00306825		1	0	0	0				0
	537	Tb927.6.700	alanyl-tRNA synthetase, putative	105.91	1.1	0.001626	1	0.00134423		0	0	0				0	1.1	1	1	1.0031	0.00134423		1	0	0	0				0
	169	Tb927.10.2730	hypothetical protein, conserved	32.833	4.1	0.0045802	1	0.00479411		0	0	0				0	4.1	1	1	1.0111	0.00479411		1	0	0	0				0
	591	Tb927.7.6770	hypothetical protein, conserved	10.985	11.3	0	1	0.0051376		0	0	0				0	11.3	1	1	1.0119	0.0051376		1	0	0	0				0
	170	Tb927.10.2800	hypothetical protein, conserved	18.838	6.9	0.0058394	1	0.00552369		0	0	0				0	6.9	1	1	1.0128	0.00552369		1	0	0	0				0
	126	Tb927.10.12500;Tb927.10.12510	P-type H+-ATPase, putative	100.23	1	0	2	0.00573804		0	0	0				0	1	1	1	1.0133	0.00573804		1	0	0	0				0
	31	Tb927.5.4460;Tb05.5K5.110	major vault protein, putative (MVP)	94.102	1.2	0.0031546	2	0.00824689		0	0	0				0	0	0	0				0	1.2	1	1	1.01917	0.00824689		1
	273	Tb927.11.14120	phenylalanyl-tRNA synthetase alpha chain, putative	57.056	1.8	0.0071225	1	0.011655		0	0	0				0	1.8	1	1	1.0272	0.011655		1	0	0	0				0
	412	Tb927.3.1690	hypothetical protein, conserved	17.154	5.5	0.0044978	1	0.015234		0	0	0				0	5.5	1	1	1.0357	0.015234		1	0	0	0				0
	329	Tb927.11.3980	mitochondrial processing peptidase alpha subunit, putative,metallo-peptidase, Clan ME, Family M16	57.037	7.1	0	1	0.0153598		0	0	0				0	7.1	2	2	1.036	0.0153598	9.9533	2	0	0	0				0
	87	Tb927.10.14740;Tb927.10.14620;Tb11.v5.1063	hypothetical protein, conserved	44.177	4.7	0.0085106	3	0.0161122		0	0	0				0	0	0	0				0	4.7	1	1	1.0378	0.0161122		1
	327	Tb927.11.3730	leucyl-tRNA synthetase, putative (LeuRS)	121.82	1.9	0	1	0.0166155		0	0	0				0	1.9	2	2	1.039	0.0166155	17.746	2	0	0	0				0
	573	Tb927.7.4180	fatty acid elongase, putative	33.87	6.9	0	1	0.017826		0	0	0				0	6.9	2	2	1.0419	0.017826	2.5746	2	0	0	0				0
	580	Tb927.7.5340	hypothetical protein, conserved	56.822	2.6	0	1	0.0201126		0	0	0				0	2.6	1	1	1.0474	0.0201126		1	0	0	0				0
	258	Tb927.11.11770	eukaryotic translation initiation factor 4e, putative	47.963	2.7	0.0046012	1	0.0206064		0	0	0				0	0	0	0				0	2.7	1	1	1.04859	0.0206064		1
	620	Tb927.8.4430	uridine phosphorylase	36.925	2.9	0.0031646	1	0.0213134		0	0	0				0	2.9	1	1	1.0503	0.0213134		1	0	0	0				0
	430	Tb927.3.3780;Tb927.3.3760	tryparedoxin 1a, putative (TXN1a)	15.891	18.1	0	2	0.0225933		0	0	0				0	18.1	1	1	1.0534	0.0225933		1	0	0	0				0
	143	Tb927.10.14810	Multiprotein-bridging factor 1, putative (mbf1)	17.974	6.2	0.0045181	1	0.0232113		0	0	0				0	6.2	1	1	1.0549	0.0232113		1	0	0	0				0
	185	Tb927.10.4080	hypothetical protein, conserved	127.1	11	0.005814	1	0.0233348		0	0	0				0	11	1	1	1.0552	0.0233348		1	0	0	0				0
	123	Tb927.10.12260	cytosolic nonspecific dipeptidase, putative,peptidase (M20/M25/M40 family), putative	51.578	1.9	0.0045662	1	0.0239928		0	0	0				0	1.9	1	1	1.0568	0.0239928		1	0	0	0				0
	253	Tb927.11.11460	hypothetical protein, conserved	68.998	2.1	0	1	0.0253468		0	0	0				0	2.1	1	1	1.0601	0.0253468		1	0	0	0				0
	97	Tb927.1.3070	hypothetical protein, conserved	44.99	9.9	0	1	0.0397576		0	0	0				0	3.9	1	1				0	6.1	1	1	1.09587	0.0397576		1
	77	Tb11.v5.0701;Tb927.10.2210	ubiquitin carboxyl-terminal hydrolase, putative	47.106	3.7	0	2	0.0400878		0	0	0				0	3.7	1	1	1.0967	0.0400878		1	0	0	0				0
	601	Tb927.8.1210	hypothetical protein, conserved	77.786	12.2	0	1	0.0418998		0	0	0				0	0	0	0				0	12.2	1	1	1.10129	0.0418998		1
	683	Tb927.9.14160	rieske iron-sulfur protein, mitochondrial precursor (RISP)	33.655	2.7	0.0057971	1	0.0430348		0	0	0				0	0	0	0				0	2.7	1	1	1.10417	0.0430348		1
	711	Tb927.9.6510	hypothetical protein, conserved	75.135	3.6	0	1	0.0455645		0	0	0				0	0	0	0				0	3.6	2	2	1.11062	0.0455645	15.12	2
	370	Tb927.11.7920	hypothetical protein, conserved	47.989	4.1	0.0097222	1	0.0469946		0	0	0				0	0	0	0				0	4.1	1	1	1.11428	0.0469946		1
	712	Tb927.9.7190	oxidoreductase, putative	49.92	2.2	0.0046083	1	0.0495669		0	0	0				0	2.2	1	1	1.1209	0.0495669		1	0	0	0				0
	360	Tb927.11.7100	cytoplasmic translation machinery associated protein, putative	22.711	4.9	0	1	0.0504958		0	0	0				0	4.9	1	1	1.1233	0.0504958		1	0	0	0				0
	731	Tb927.9.9670	proteasome alpha 1 subunit, putative,20S proteasome subunit alpha-6, (putative) (TbPSA6)	27.543	4	0.0046368	1	0.0516926		0	0	0				0	4	1	1	1.1264	0.0516926		1	0	0	0				0
	444	Tb927.4.110;Tb927.2.100;Tb927.9.15810	retrotransposon hot spot protein (RHS, pseudogene), putative,retrotransposon hot spot protein 1 (RHS1), interrupted	40.669	19.5	0	3	0.0581111		12.3	3	0				0	14.5	4	0				0	12.8	3	1	1.14317	0.0581111		1
	695	Tb927.9.3340	hypothetical protein, conserved	20.051	7.1	0	1	0.0614252		0	0	0				0	0	0	0				0	7.1	1	1	1.15193	0.0614252		1
	70	Tb11.v5.0605;Tb927.10.14140	pyruvate kinase 1, putative	49.938	4.1	0	2	0.0631081		0	0	0				0	4.1	1	1	1.1564	0.0631081		1	0	0	0				0
	335	Tb927.11.5220	chaperone protein DNAj, putative	84.81	1.7	0.0058565	1	0.0638585		0	0	0				0	1.7	1	1	1.1584	0.0638585		1	0	0	0				0
	403	Tb927.2.5240	PRP19-like protein, putative (TbPRP19)	54.268	3.1	0	1	0.065446		0	0	0				0	0	0	0				0	3.1	1	1	1.16264	0.065446	21.562	2
	165	Tb927.10.2350	pyruvate dehydrogenase complex E3 binding protein, putative	27.335	6.9	0	1	0.0696981		0	0	0				0	0	0	0				0	6.9	1	1	1.17408	0.0696981		1
	480	Tb927.5.1460	hypothetical protein, conserved	36.762	3.7	0	1	0.0712509		0	0	0				0	0	0	0				0	3.7	1	1	1.17829	0.0712509		1
	518	Tb927.6.2790	L-threonine 3-dehydrogenase, putative	36.957	5.7	0	1	0.0724705		0	0	0				0	0	0	0				0	5.7	1	1	1.1816	0.0724705		1
	700	Tb927.9.4500	heat shock protein, putative,HSP70-like protein	91.117	1.3	0.0016234	1	0.072568		0	0	0				0	0	0	0				0	1.3	1	1	1.18187	0.072568		1
	189	Tb927.10.4280	hypothetical protein, conserved	24.055	5	0.0057637	1	0.0731844		0	0	0				0	0	0	0				0	5	1	1	1.18354	0.0731844		1
	196	Tb927.10.4890	hypothetical protein, conserved	32.142	4.7	0	1	0.0738325		0	0	0				0	0	0	0				0	4.7	1	1	1.18531	0.0738325		1
	323	Tb927.11.3380	Ran-binding protein 1, putative	17.703	7.6	0	1	0.0741945		0	0	0				0	7.6	1	1	1.1863	0.0741945		1	0	0	0				0
	581	Tb927.7.5480	dihydrofolate reductase-thymidylate synthase (DHFR-TS)	58.85	1.9	0	1	0.0841782		0	0	0				0	0	0	0				0	1.9	1	1	1.21389	0.0841782	1.8872	2
	128	Tb927.10.12710	heat shock protein 110, putative	90.863	1.2	0	1	0.0847321		0	0	0				0	0	0	0				0	1.2	1	1	1.21544	0.0847321	30.253	2
	183	Tb927.10.3990	DHH1 (DHH1)	46.468	2	0.0031746	1	0.0864245		0	0	0				0	0	0	0				0	2	1	1	1.22018	0.0864245		1
	533	Tb927.6.4990	ATP synthase, epsilon chain, putative	20.147	7.1	0	1	0.0865942		0	0	0				0	0	0	0				0	7.1	1	1	1.22066	0.0865942		1
	155	Tb927.10.15530	ABC transport system ATP-binding protein, putative	67.522	2.5	0	1	0.0875813		0	0	0				0	0	0	0				0	2.5	1	1	1.22344	0.0875813		1
	223	Tb927.10.7850	protein-L-isoaspartate, putative	25.68	6.2	0	1	0.0895517		0	0	0				0	0	0	0				0	6.2	1	1	1.229	0.0895517		1
	147	Tb927.10.14950	Zinc finger CCCH domain-containing protein 40,RNA binding protein, putative (ZC3H40)	46.194	3.7	0	1	0.0902301		0	0	0				0	0	0	0				0	3.7	1	1	1.23092	0.0902301		1
	692	Tb927.9.2100	hypothetical protein, conserved	46.715	2.4	0.0097902	1	0.0912363		0	0	0				0	0	0	0				0	2.4	1	1	1.23378	0.0912363		1
	48	Tb11.1790	retrotransposon hot spot protein (RHS, pseudogene), putative	64.461	5.5	0	1	0.0920536		2.1	1	0				0	5.5	3	1	1.2361	0.0920536		1	3.7	2	0				0
	397	Tb927.2.4370	trypanothione synthetase (TRYS)	71.612	1.9	0	1	0.0923039		0	0	0				0	0	0	0				0	1.9	1	1	1.23681	0.0923039		1
	95	Tb927.1.2750	hypothetical protein, conserved	18.698	7.1	0	1	0.0938212		0	0	0				0	0	0	0				0	7.1	1	1	1.24114	0.0938212		1
	400	Tb927.2.4980	hypothetical protein, conserved	29.837	4.3	0.0058651	1	0.0969046		0	0	0				0	0	0	0				0	4.3	1	1	1.24998	0.0969046		1
	678	Tb927.9.1350	hypothetical protein, conserved	59.813	1.7	0.0031056	1	0.0976544		0	0	0				0	0	0	0				0	1.7	1	1	1.25214	0.0976544		1
	402	Tb927.2.5180	aldo-keto reductase, putative	38.267	3.2	0	1	0.0997203		0	0	0				0	0	0	0				0	3.2	1	1	1.25811	0.0997203		1
	90	Tb927.1.220;Tb927.1.180;Tb927.2.370	retrotransposon hot spot protein 1 (RHS1), putative	94.568	5.4	0	3	0.102675		3.2	2	0				0	2.4	2	0				0	4.4	3	1	1.2667	0.102675		1
	483	Tb927.5.1820	60S acidic ribosomal protein, putative	10.132	21.5	0	1	0.104097		0	0	0				0	0	0	0				0	21.5	1	1	1.27086	0.104097		1
	175	Tb927.10.3030;Tb927.10.2980	proteasome regulatory non-ATPase subunit 11,Metallo-peptidase, Clan MP, Family M67,19S proteasome regulatory subunit 11 (RPN11)	33.847	7.2	0	2	0.106191		0	0	0				0	7.2	1	1	1.277	0.106191		1	0	0	0				0
	442	Tb927.3.800	hypothetical protein, conserved	30.573	4.3	0.0084986	1	0.106765		0	0	0				0	0	0	0				0	4.3	1	1	1.27869	0.106765		1
	571	Tb927.7.3940	mitochondrial carrier protein,ADP/ATP mitochondrial translocase, putative,adenine nucleotide mitochondrial translocator, putative (MCP16)	36.34	5.1	0	1	0.109916		0	0	0				0	5.1	1	1	1.288	0.109916		1	0	0	0				0
	186	Tb927.10.4120;Tb927.10.4110	60S ribosomal protein L30 (RPL30)	11.512	9.5	0	2	0.111237		0	0	0				0	0	0	0				0	9.5	1	1	1.29192	0.111237	13.019	2
	498	Tb927.5.4310	GTP-binding protein, putative	91.346	3.1	0	1	0.116481		0	0	0				0	0	0	0				0	3.1	2	2	1.30762	0.116481	10.037	2
	314	Tb927.11.2500	carboxypeptidase, putative,metallo-peptidase, Clan MA(E) Family M32	57.683	1.8	0.0045249	1	0.117481		0	0	0				0	0	0	0				0	1.8	1	1	1.31063	0.117481		1
	454	Tb927.4.2110	protein phosphatase 2C, putative	33.456	3.8	0	1	0.121757		0	0	0				0	3.8	1	1	1.3236	0.121757		1	0	0	0				0
	356	Tb927.11.6850	hypothetical protein, conserved	26.513	4.2	0.0046225	1	0.121817		0	0	0				0	0	0	0				0	4.2	1	1	1.32378	0.121817		1
	648	Tb927.8.990	RNA-binding protein 33 (RNA-binding motif protein 33) (RBP33)	33.963	3.8	0.0098315	1	0.122439		0	0	0				0	0	0	0				0	3.8	1	1	1.32568	0.122439		1
	38	Tb11.02.5070b;Tb927.11.7212	hypothetical protein, conserved	32.082	3.8	0.0059347	2	0.125107		0	0	0				0	0	0	0				0	3.8	1	1	1.33385	0.125107		1
	467	Tb927.4.410	CAF 40 (CAF40)	35.32	3.5	0	1	0.125686		0	0	0				0	0	0	0				0	3.5	1	1	1.33563	0.125686		1
	270	Tb927.11.13980	hypothetical protein, conserved	50.4	7	0	1	0.126354		0	0	0				0	0	0	0				0	7	2	2	1.33769	0.126354	8.2396	2
	267	Tb927.11.13610	hypothetical protein, conserved	15.688	6.6	0.0058737	1	0.130346		0	0	0				0	0	0	0				0	6.6	1	1	1.35004	0.130346		1
	636	Tb927.9.14370;Tb927.8.6180	60S ribosomal protein L26, putative	16.454	7	0	2	0.130645		0	0	0				0	0	0	0				0	7	1	1	1.35097	0.130645		1
	349	Tb927.11.6360	60S ribosomal protein L24, putative	22.732	4.2	0.0084866	1	0.135216		0	0	0				0	0	0	0				0	4.2	1	1	1.36526	0.135216		1
	173	Tb927.10.2910	splicing factor PTSR1 interacting protein (TSR1IP)	43.652	7.7	0	1	0.138651		0	0	0				0	0	0	0				0	7.7	3	3	1.3761	0.138651	5.9618	3
	99	Tb927.1.4050	protein phosphatase with EF-Hand domains (PPEF),ser/thr protein phosphatase, putative	105.75	1.9	0	1	0.144905		0	0	0				0	0	0	0				0	1.9	2	2	1.39606	0.144905	4.1213	2
	308	Tb927.11.2110	hypothetical protein, conserved	24.813	7	0	1	0.146874		0	0	0				0	0	0	0				0	7	1	1	1.40241	0.146874		1
	382	Tb927.11.9670	glycine synthase, putative (GCVT1)	41.142	12.5	0	1	0.14936		0	0	0				0	0	0	0				0	12.5	3	3	1.41046	0.14936	12.069	4
	268	Tb927.11.13660	hypothetical protein, conserved	15.677	7.4	0.0057554	1	0.150243		0	0	0				0	0	0	0				0	7.4	1	1	1.41333	0.150243		1
	293	Tb927.11.16380	hypothetical protein, conserved	23.331	7.6	0	1	0.150255		0	0	0				0	0	0	0				0	7.6	1	1	1.41337	0.150255		1
	309	Tb927.11.2120	hypothetical protein, conserved	88.832	1.3	0.0059084	1	0.151128		0	0	0				0	0	0	0				0	1.3	1	1	1.41621	0.151128		1
	315	Tb927.11.2640	ras-like small GTPase, putative (TbNST)	53.387	3.9	0.0059172	1	0.152156		0	0	0				0	0	0	0				0	3.9	1	1	1.41957	0.152156		1
	546	Tb927.7.1670	Eukaryotic translation initiation factor 4E type 6 (eif4e6)	20.864	7.5	0	1	0.156967		0	0	0				0	0	0	0				0	7.5	1	1	1.43538	0.156967		1
	525	Tb927.6.4070	hypothetical protein, conserved	29.319	5	0.0097493	1	0.159091		0	0	0				0	0	0	0				0	5	1	1	1.44242	0.159091		1
	82	Tb11.v5.0871;Tb927.8.1190;Tb927.8.1170	hypothetical protein, conserved	33.978	4.2	0	3	0.160924		0	0	0				0	0	0	0				0	4.2	2	2	1.44852	0.160924	17.656	2
	733	Tb927.9.9780	peptidyl-prolyl cis-trans isomerase (cyclophilin- 40), putative,cyclophilin-40, putative	38.095	3.4	0	1	0.16877		0	0	0				0	0	0	0				0	3.4	1	1	1.47493	0.16877		1
	508	Tb927.6.1700	hypothetical protein, conserved	22.082	5.8	0.0031201	1	0.173368		0	0	0				0	0	0	0				0	5.8	1	1	1.49062	0.173368		1
	569	Tb927.7.3700	hypothetical protein, conserved	33.765	3.6	0	1	0.175055		0	0	0				0	0	0	0				0	3.6	1	1	1.49642	0.175055		1
	64	Tb927.10.15370;Tb11.v5.0480	DNA-directed RNA polymerases I and III subunit RPAC1, putative (RPC40)	37.377	4.7	0	2	0.179345		0	0	0				0	0	0	0				0	4.7	2	2	1.51128	0.179345	7.2688	2
	83	Tb927.4.3110;Tb11.v5.0960	tRNA-dihydrouridine synthase 4, putative	45.355	2.4	0	2	0.180792		0	0	0				0	0	0	0				0	2.4	1	1	1.51632	0.180792		1
	211	Tb927.10.6610	chaperone protein DNAj, putative	31.198	3.6	0.0058055	1	0.182395		0	0	0				0	0	0	0				0	3.6	1	1	1.52193	0.182395		1
	250	Tb927.11.10950	hypothetical protein, conserved	36.848	8.8	0	1	0.183805		0	0	0				0	0	0	0				0	8.8	2	2	1.52688	0.183805	7.8008	2
	207	Tb927.10.5920	hypothetical protein, conserved	85.743	1.9	0.0045045	1	0.190137		0	0	0				0	0	0	0				0	1.9	1	1	1.54931	0.190137		1
	301	Tb927.11.1720	hypothetical protein, conserved	24.613	5.1	0	1	0.211301		0	0	0				0	0	0	0				0	5.1	1	1	1.62668	0.211301		1
	619	Tb927.8.4390	Translation initiation factor eIF-2B subunit beta, putative (EIF2BB)	51.583	3.8	0	1	0.233174		0	0	0				0	3.8	1	1	1.7107	0.233174		1	0	0	0				0
	529	Tb927.6.4800	hypothetical protein, conserved	46.376	2.4	0.0016181	1	0.241459		0	0	0				0	0	0	0				0	2.4	1	1	1.74365	0.241459		1
	424	Tb927.3.3270	ATP-dependent phosphofructokinase (PFK)	53.517	2.3	0.0031898	1	0.262211		0	0	0				0	0	0	0				0	2.3	1	1	1.82899	0.262211		1
	338	Tb927.11.5600	hypothetical protein, conserved	13.577	9.2	0	1	0.501579		0	0	0				0	0	0	0				0	9.2	1	1	3.1738	0.501579		1
	366	Tb927.11.7780	hypothetical protein, conserved	46.237	6	0	1	0.560288		0	0	0				0	0	0	0				0	6	1	1	3.63319	0.560288		1
	282	Tb927.11.15070	hypothetical protein, conserved	119.15	2.3	0	1	0.788452		0	0	0				0	0	0	0				0	2.3	2	2	6.14402	0.788452	222.65	2
	720	Tb927.9.8290	hypothetical protein, conserved	25.114	3.7	0.0045593	1	1.02504		3.7	1	1				0	0	0	0				0	3.7	1	1	10.5934	1.02504		1
